# 1 **CLADES: a programmable sequence of reporters for lineage analysis**

2 **Authors:** Jorge Garcia-Marques<sup>1\*</sup>, Ching-Po Yang<sup>1</sup>, Isabel Espinosa-Medina<sup>1</sup>, Minoru Koyama<sup>1</sup>,  
3 Tzumin Lee<sup>1\*</sup>

## 4 **Affiliations:**

5 <sup>1</sup>Janelia Research Campus, Howard Hughes Medical Institute; Ashburn, VA, 20147; USA.

6 \*Correspondence to: garciamarquesj@janelia.hhmi.org, leet@janelia.hhmi.org

7 **Abstract:** We present CLADES (Cell Lineage Access Driven by an Edition Sequence), a  
8 technology for cell lineage studies based on CRISPR/Cas9. CLADES relies on a system of genetic  
9 switches to activate and inactivate reporter genes in a pre-determined order. Targeting CLADES  
10 to progenitor cells allows the progeny to inherit a sequential cascade of reporters, coupling birth  
11 order with reporter expression. This gives us temporal resolution of lineage development that can  
12 be used to deconstruct an extended cell lineage by tracking the reporters expressed in the progeny.  
13 When targeted to the germ line, the same cascade progresses across animal generations, marking  
14 each generation with the corresponding combination of reporters. CLADES thus offers an  
15 innovative strategy for making programmable cascades of genes that can be used for genetic  
16 manipulation or to record serial biological events.

17 **One Sentence Summary:** A sequence of reporters for lineage analysis

18 **Main Text:** Cell lineage is an essential determinant in the acquisition of cell identity (1-2).  
19 Establishing the association between cell lineage and fate is one of the fundamental challenges in  
20 biology. Solving this puzzle will provide a unique framework to interrogate the molecular  
21 mechanisms involved in cell type specification: it is not possible to fully understand how a  
22 molecular factor affects cell fate decisions if we do not even know where/when these cell fate  
23 decisions occur.

24 While single-cell transcriptomics has made it possible to identify cell types with great detail,  
25 tracing lineages in complex organisms remains challenging. Two main strategies have been  
26 deployed: i) imaging-based methods that label cell lineages in intact tissues (3-4), and ii) DNA  
27 sequencing-based methods which unravel cell lineages via phylogenetic analysis of DNA  
28 mutations accumulated during development (5-7). Unless the specimen is accessible for real-time  
29 visualization, imaging-based strategies are only able to label cell clones rather than tracing lineage  
30 progression in a single individual. For organisms with stereotyped development, full lineages can  
31 be assembled by resolving smaller segments in multiple individuals (8). Besides overlooking inter-  
32 individual differences, this approach is tedious and makes it impractical to analyze mutant lineages  
33 in detail. On the other hand, methods based on DNA sequencing allow high-throughput analysis  
34 of lineage progression, although the resolution is currently limited to major lineage branches (7).  
35 Moreover, sequencing methods fail to recover spatial and morphological information, critical  
36 features for identification of cell types and mutant phenotypes.

37 To circumvent these limitations, we developed CLADES, a technology based on CRISPR/Cas9 to  
38 trace and manipulate lineages in *Drosophila*. Inspired by principles of synthetic biology, we  
39 engineered a programmable system of genetic switches to control the activation and inactivation  
40 of reporter genes in a coordinated manner. This creates a sequence of colors (reporter

**a**

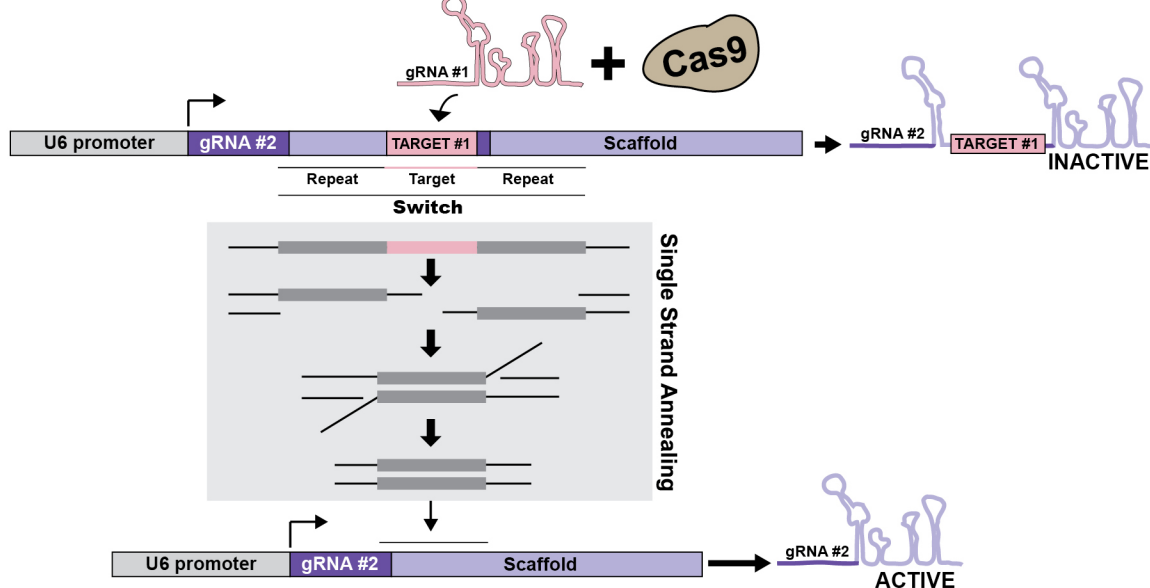

**b**

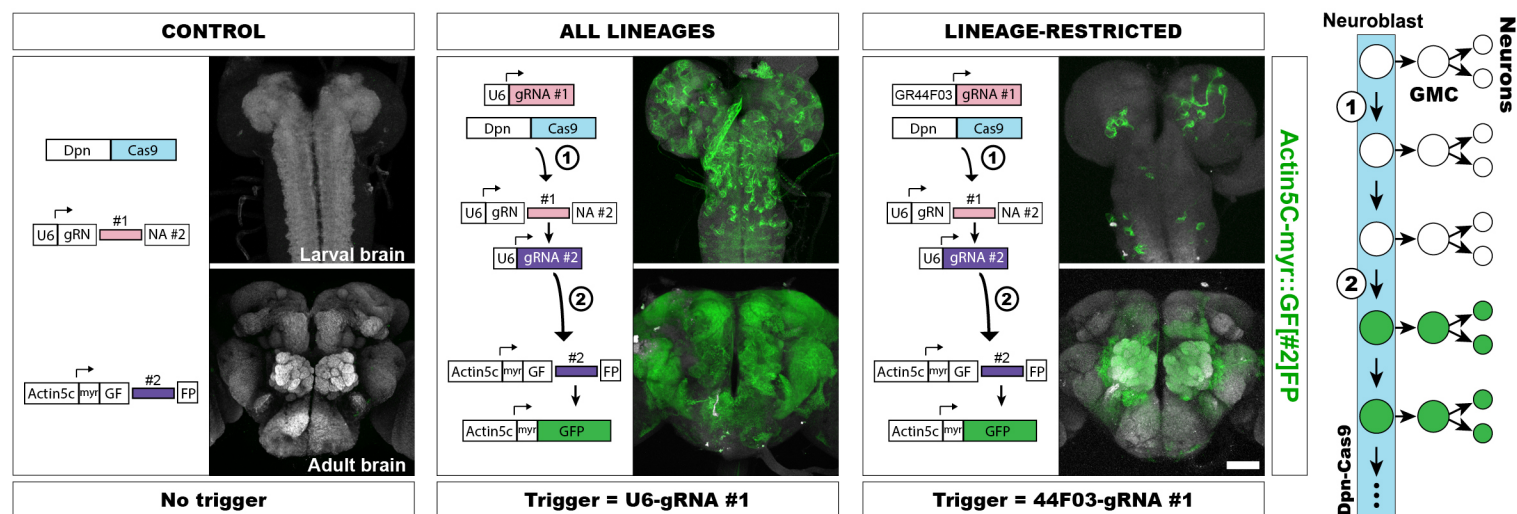

**Fig 1. A conditional gRNA scaffold that is activated by other gRNAs**

(A) Cartoon illustrating the conditional gRNA design. (B) Conditional gRNA activation by a trigger gRNA. For each experiment: left, scheme showing the cascade of events occurring in the fly brain. Right, representative examples of larval and adult brains showing immunohistochemistry for GFP expression. N=30 brains. Scale bar = 50 micrometers.

41 combinations) whose order is pre-established. Birth-order is then deducted from the specific color  
42 inherited by the progeny (neurons) from the progenitor cell (neuroblast). Thus, early- and late-  
43 born cells are labeled with the first or the last color in the sequence respectively. The coordinated  
44 activation and inactivation of reporters maximizes the number of markers that can be  
45 simultaneously imaged, permitting straightforward lineage tracing.

## 46 **A conditional gRNA scaffold that is activated by other gRNAs**

47 Controlling the sequential activation and deactivation of multiple reporter genes requires a  
48 sophisticated mechanism of genetic switches, unattainable with any existent technology. We  
49 therefore decided to build upon CaSSA, a tool to control the activation of reporter genes (9). This  
50 technology utilizes CRISPR/Cas9 (10) to induce a double-strand break (DSB). If there are  
51 homologous sequences (direct repeats) on either side of the DSB, single strand annealing (SSA) is  
52 the most likely mechanism of DNA repair (11-12). This pathway repairs DNA by recombining  
53 both direct repeats and removing the intervening sequence. As this repair outcome is predictable,  
54 one can design genetic elements that only become active after a DSB is repaired by SSA. Despite  
55 we initially applied it to reporter genes (9), we reasoned this concept could be extended to generate  
56 gRNAs that could be controlled by other gRNAs. These conditional gRNAs could then be  
57 organized as a synthetic cascade to sustain the expression of specific combinations of genetic  
58 markers in a pre-defined order.

59 To generate such conditional gRNAs, we need to make an inactive form of gRNA with two direct  
60 repeats flanking the target site of a trigger gRNA (switch). In the initial, inactive gRNA  
61 configuration, the inclusion of the switch alters the secondary structure, thus abolishing its activity.  
62 We first explored various strategies to make such inactive form of gRNA (Fig. S1), resulting in an  
63 optimized conditional gRNA containing the switch within the scaffold region (Fig. 1A).

64 The switch is initiated only after the induction of a DSB by the combination of Cas9 and a trigger  
65 gRNA. The ensuing SSA repair recombines both repeats and collapses the switch, restoring the  
66 original gRNA structure and function. To validate the optimized conditional gRNA (Fig. 1B), we  
67 generated a fly line expressing three transgenes: i) the conditional gRNA, gRN[#1]NA#2 under  
68 the control of the ubiquitous U6 promoter. The nomenclature of the conditional gRNAs reflects  
69 the target site for the specific trigger gRNA within brackets and the direct repeats surrounding the  
70 target are represented by a repeated letter, ii) a conditional GFP reporter that responds to the  
71 gRNA#2 (9), GF[#2]FP driven by ubiquitous Actin5C, and iii) a Cas9 nuclease driven by a  
72 neuroblast-specific promoter, deadpan (Dpn). If, as we envision, the conditional gRN[#1]NA#2 is  
73 inactive in the initial configuration, the GF[#2]FP reporter will also remain inactive in the absence  
74 of the trigger gRNA. We found only minimal leakiness when the conditional gRNA and  
75 conditional GFP were co-expressed without the trigger gRNA (~1 out of  $4.72 \times 10^4$  neuroblasts had  
76 GFP fluorescence). Only after crossing the line above to a fly bearing the trigger U6-gRNA#1, the  
77 conditional gRN[#1]NA#2 became functional and, in turn, activated the GF[#2]FP reporter,  
78 resulting in abundant GFP expression. Given that the reconstitution of the reporter is an inheritable  
79 modification in the DNA, confining Cas9 to the neuroblasts resulted in GFP expression in these  
80 cells but also in their progeny. This led to a seemingly ubiquitous expression of GFP in adult  
81 brains. We also confirmed that this expression could be restricted to a subset of lineages by  
82 providing the trigger gRNA#1 under the regulation of GR44F03, a driver that is mostly restricted  
83 to the antennal lobe lineages (9). This resulted in the expected pattern with consistent labeling of

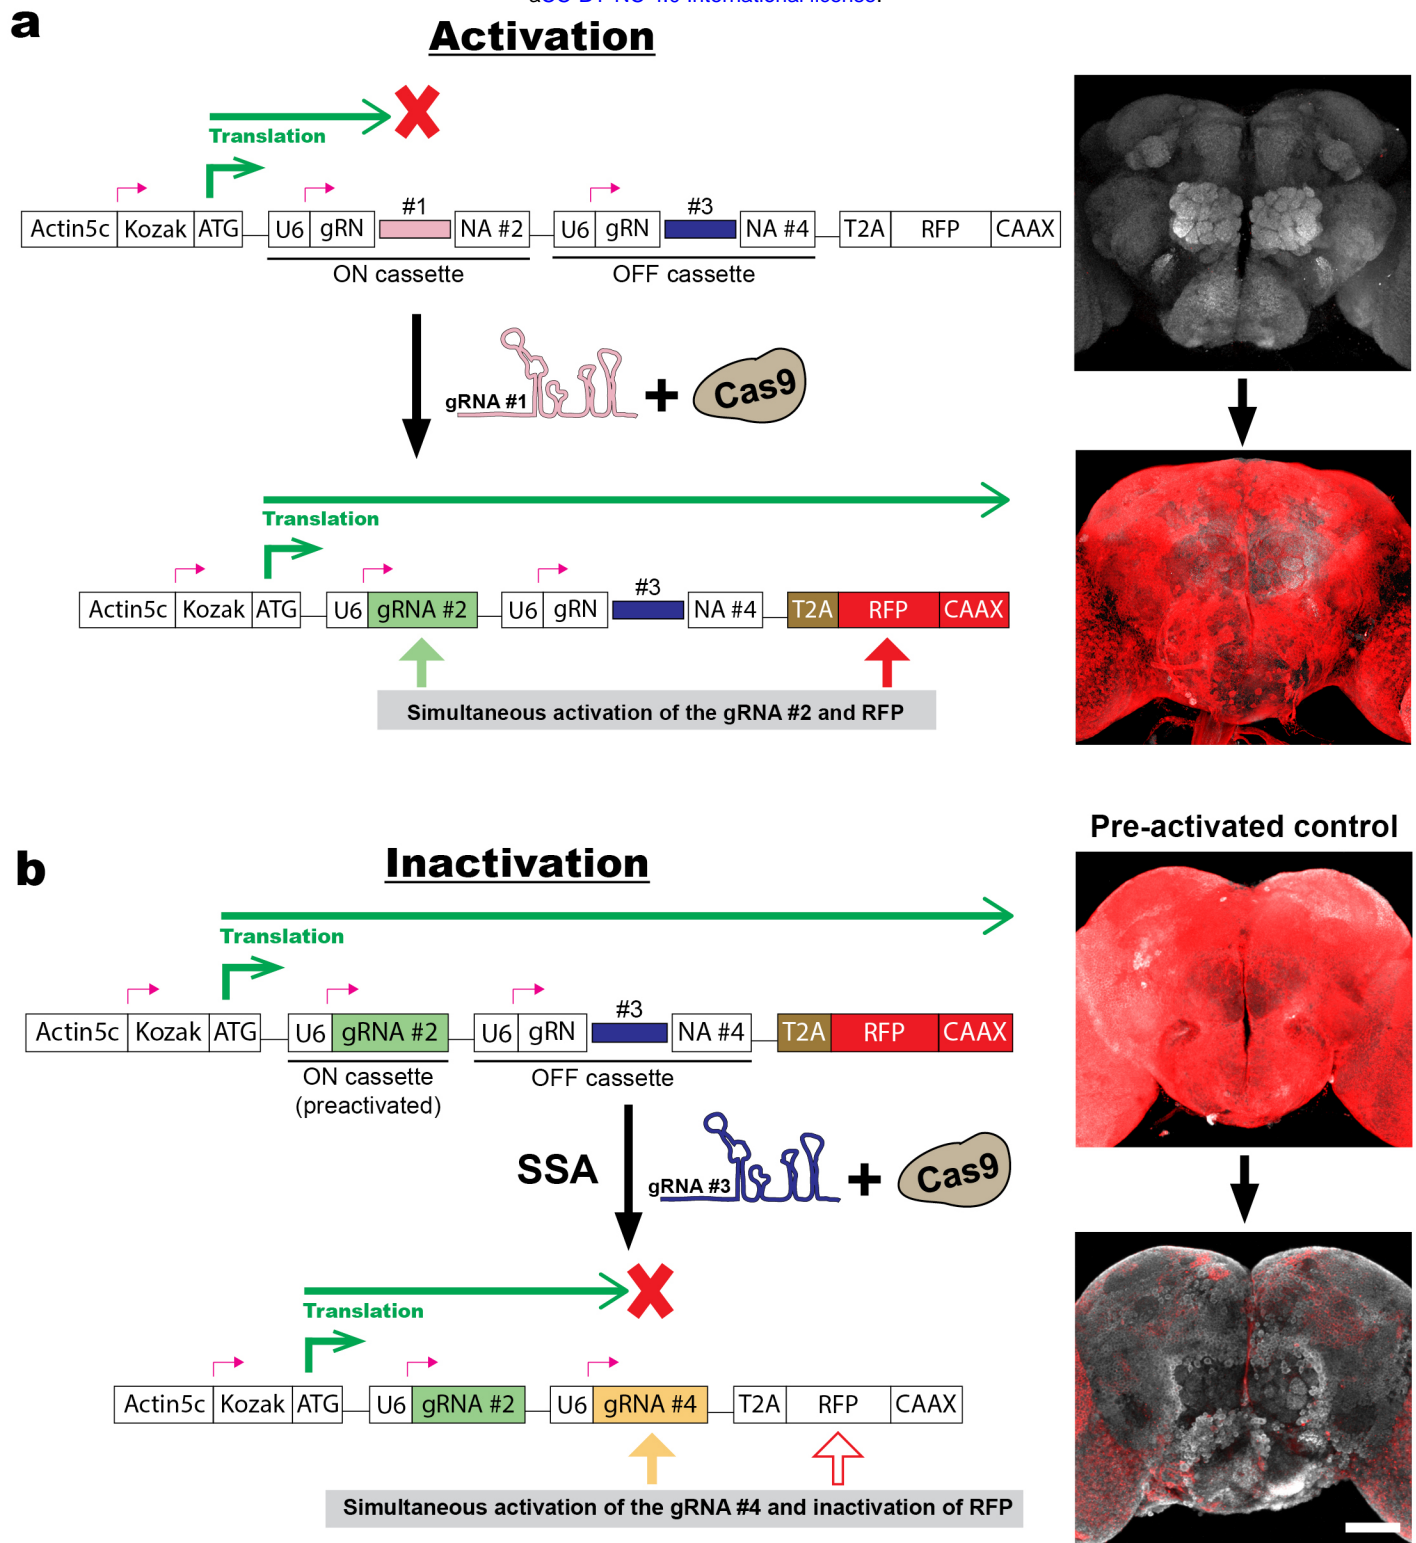

**Fig 2. A coupled cascade of gRNAs and reporters**

(A) The activation of the conditional gRNA#2 (ON cassette) by Cas9 and the trigger gRNA#1 leads to an ORF shift that brings the reporter into frame. Thus, both the gRNA#2 and the reporter (red fluorescence) become simultaneously active. (B) In the inactivation (or activation of the OFF cassette), the gRNA#4 is activated by Cas9 and the gRNA#3, bringing the reporter out of frame (tested with a pre-activated version of the construct). Red, immunohistochemistry for RFP. N=18 brains. Scale bar = 50 micrometers.

84 antennal lobe lineages plus occasional hits in mushroom body and ellipsoid body lineages (Fig.  
85 1B). To directly quantify the extent of gRNA reconstitution, we examined the gRNA repair  
86 outcome by targeted amplicon analysis via next-generation sequencing (Fig. S2). The adult brains  
87 retained a minor proportion (14.17%) of the conditional gRN[*#1*]NA#2 in the unedited state, and  
88 SSA repair occurred in 56.28% of the edited reads. The rest of edits consisted mostly of small  
89 deletions or insertions. Despite the suboptimal efficiency, we reasoned this would not be an issue  
90 as CLADES should allow to resolve a lineage from a small number of clones (see below). These  
91 results confirm the success of the conditional gRNA design, which could respond to other gRNAs  
92 with minimal leakiness. To explore the applicability of this technology to vertebrate models, we  
93 tested the same conditional gRNA design in zebrafish (Fig. S3). We injected plasmids encoding:  
94 i) an injection control (RFP), Cas9 and a YF[*#2*]FP reporter, all of them in the same open reading  
95 frame transcribed from the Ubi promoter (ubiquitous) and ii) the U6-gRN[*#1*]NA#2 conditional  
96 gRNA. Only after providing the trigger gRNA#1 (Fig. S3B), a substantial percentage of cells  
97 expressed YFP (~54%). This experiment proved that our conditional gRNA design worked  
98 consistently in fish, demonstrating the feasibility of this technology in vertebrates.

### 99 **A coupled cascade of gRNAs and reporters**

100 Tracing lineages requires labeling cells with as many distinguishable marks as possible. For  
101 imaging-based methods, this parameter can be maximized via the specific combination of different  
102 fluorophores. The new conditional gRNA unlocks the potential to trigger cascades of gRNAs,  
103 which could in turn control the sequential activation/inactivation of reporter genes. A requisite to  
104 deliver a fixed sequence of reporter expression is that the order of reporter activation/inactivation  
105 should always follow the same order as the gRNA cascade. However, when the activation of  
106 reporters was controlled in trans by a gRNA cascade, we found this was not the case (Fig. S4). To  
107 circumvent this issue, we optimized a construct where the activation of conditional gRNAs was  
108 inextricably linked to the activation/inactivation of a reporter gene (Fig. 2 and S5). We  
109 accomplished this by embedding two conditional gRNAs within the open reading frame (ORF) of  
110 the reporter (Fig. S5), each comprising either the ON or the OFF cassette and controlling the  
111 activation or the inactivation of the reporter. In the initial state of the ON cassette, the switch in  
112 the conditional gRNA simultaneously inhibits the gRNA function and places the reporter out of  
113 frame. Coexistence of Cas9 and the trigger gRNA produces a DSB in this switch followed by SSA.  
114 The SSA event concurrently reconstitutes the conditional gRNA and brings the reporter into frame.  
115 Likewise, a similar switch in the OFF cassette controls the simultaneous activation of another  
116 gRNA and inactivation of the reporter. Based on this design, we generated a fly line expressing  
117 this conditional version of an RFP reporter (CLADES1.0-RFP). We also generated control flies  
118 expressing CLADES1.0-RFP variants with either the ON or both ON and OFF cassettes artificially  
119 pre-activated. As expected, the CLADES1.0-RFP-ON variant showed strong fluorescence and the  
120 CLADES1.0-RFP-ON-OFF variant had no fluorescence (Fig. S6). To test activation by the ON  
121 cassette, the line expressing CLADES1.0-RFP was crossed to flies bearing Dpn-Cas9 and the  
122 trigger U6-gRNA#1 (Fig. 2A). Only those flies expressing the three elements exhibited red  
123 fluorescence. This fluorescence was strong and seemingly ubiquitous in the brain. To test the OFF  
124 cassette, we crossed CLADES1.0-RFP-ON to a line with Dpn-Cas9 and the U6-gRNA#3, which  
125 eliminated most of the fluorescence in the fly brain (Fig. 2B). The residual fluorescence was  
126 expected and was most likely the consequence of: i) actin driven reporter expression in cells not  
127 derived from neuroblasts, ii) the editing event occurring after the birth of some early neurons, or

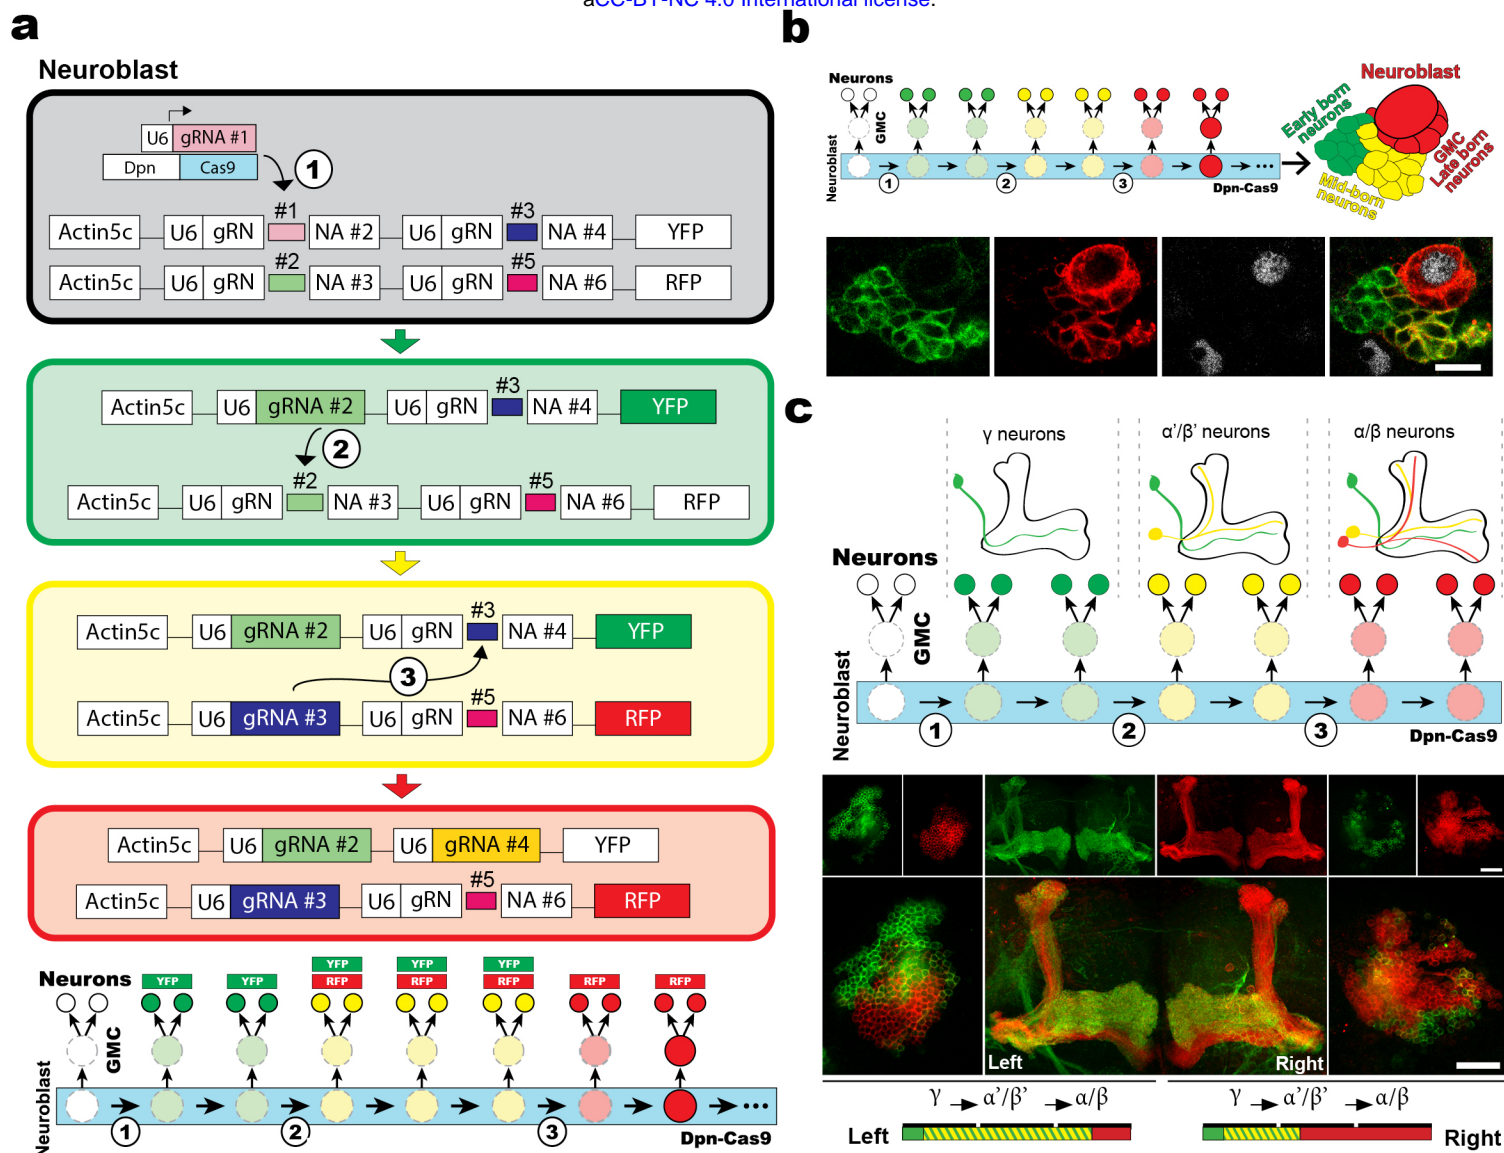

**Fig 3. CLADES 1.0: two reporters, three colors**

(A) Scheme illustrating the cascade progression in CLADES 1.0. (B) Neuronal clone in the larval brain labeled with CLADES. (C) CLADES labeling in the mushroom body lineage. In the right hemisphere, the red-only fluorescence labels the full alpha/beta and part of the alpha'/beta' population, while the green and red or green-only labels the gamma and part of the alpha'/beta' population. Green, red, gray, immunohistochemistry for GFP (YFP), RFP, Dpn respectively. Scale bars = 10 micrometers in B and 50 micrometers in C.

128 iii) the occurrence of imprecise DNA repair that does not change the reporter ORF. These results  
129 prove that specific gRNAs can activate or inactivate a CLADES-reporter in an efficient manner.

### 130 **CLADES 1.0: two reporters, three colors**

131 We next examined if those conditional gRNAs, embedded within the ORF of reporter genes, can  
132 progress as a cascade. We designed the first reporter cascade based on CLADES (Fig. 3A). To do  
133 this, we generated a second reporter, CLADES1.0-YFP that would function together with  
134 CLADES1.0-RFP to sequentially change colors from green to yellow to red. In CLADES1.0-YFP,  
135 the gRNA#1 (gRNAs were renumbered for simplicity, see Table 2) is designed to concurrently  
136 turn on a YFP gene (YFP+ = green fluorescence) and the gRNA#2. In the subsequent step of the  
137 cascade, the gRNA#2 would trigger the ON cassette in CLADES1.0-RFP (YFP+/RFP+ = yellow  
138 fluorescence) as well as the gRNA#3. In the final cascade step, the gRNA#3 is intended to  
139 simultaneously activate the gRNA#4 and inactivate the YFP reporter (YFP-/RFP+ = red  
140 fluorescence). To test this cascade, we generated a fly bearing CLADES1.0-YFP, CLADES1.0-  
141 RFP, Dpn-Cas9 and U6-gRNA#1 transgenes. Neither the U6-gRNA#1 nor the Dpn-Cas9  
142 transgene alone was able to trigger either reporter (Fig. S7A). Only after combining all four  
143 components (CLADES constructs are inserted into a single chromosome to facilitate future  
144 experiments), we found clones expressing green, yellow and/or red fluorescence. Similarly, in the  
145 absence of the first reporter, providing the U6-gRNA#1 and Dpn-Cas9 failed to activate the second  
146 reporter (Fig. S7B). We followed the color progression across larval development (Fig. S8). We  
147 detected the virtually only-green neuroblasts at 0H ALH and the plateauing of yellow neuroblasts  
148 at 24H ALH. The onset of RFP expression was followed by emergence of red-only neuroblasts at  
149 60H ALH. The percentage of red-only neuroblasts increased at 84H ALH, concomitant with a  
150 decrease in yellow neuroblasts after the green reporter becomes inactive. The proportion of cells  
151 with each color decayed following the cascade progression, consistent with unedited reporters or  
152 expected indels that prevent the cascade from progressing to the next step.

153 Now that we have a three-color cascade, we wanted to apply it to follow the progression of  
154 neuronal lineages. For an initial characterization, we tested CLADES using the GR44F03 driver  
155 so that we could resolve single lineages. In third instar larval brains, a typical pattern existed of  
156 neuroblasts expressing red fluorescence, surrounded by its progeny of GMCs and neurons labeled  
157 in red, yellow or green (Fig. 3B). Given minimal neuron migration in *Drosophila*, neurons are  
158 pushed away from the neuroblast as new GMCs and neurons are born. Consequently, closest to  
159 the neuroblast are the youngest cells, newborn GMCs and neurons (red), slightly further away are  
160 mid-born neurons (yellow) and finally the oldest, early-born neurons (green). To further  
161 characterize CLADES 1.0, we targeted it to the four 'equivalent' mushroom body lineages (Fig.  
162 3C). These lineages are well characterized to give rise to three types of neurons in a consecutive  
163 order: gamma, alpha-prime/beta-prime, and finally alpha/beta neurons (13). For stochastic  
164 labeling, we used the minimal activity of the GR44F03 driver in the mushroom bodies to target  
165 only one of these lineages at a time. Notably, 3-color CLADES revealed a pattern consistent with  
166 the birth order previously described (Fig. 3C). In summary, these results demonstrate that gRNAs  
167 embedded in the CLADES constructs are functional and allow to design genetic cascades.  
168 Targeting CLADES to progenitor cells allowed the progeny to inherit a sequential cascade of  
169 reporters, coupling birth order with reporter expression.

### 170 **CLADES 2.0: combining a five-color cascade with GAL4 induction**

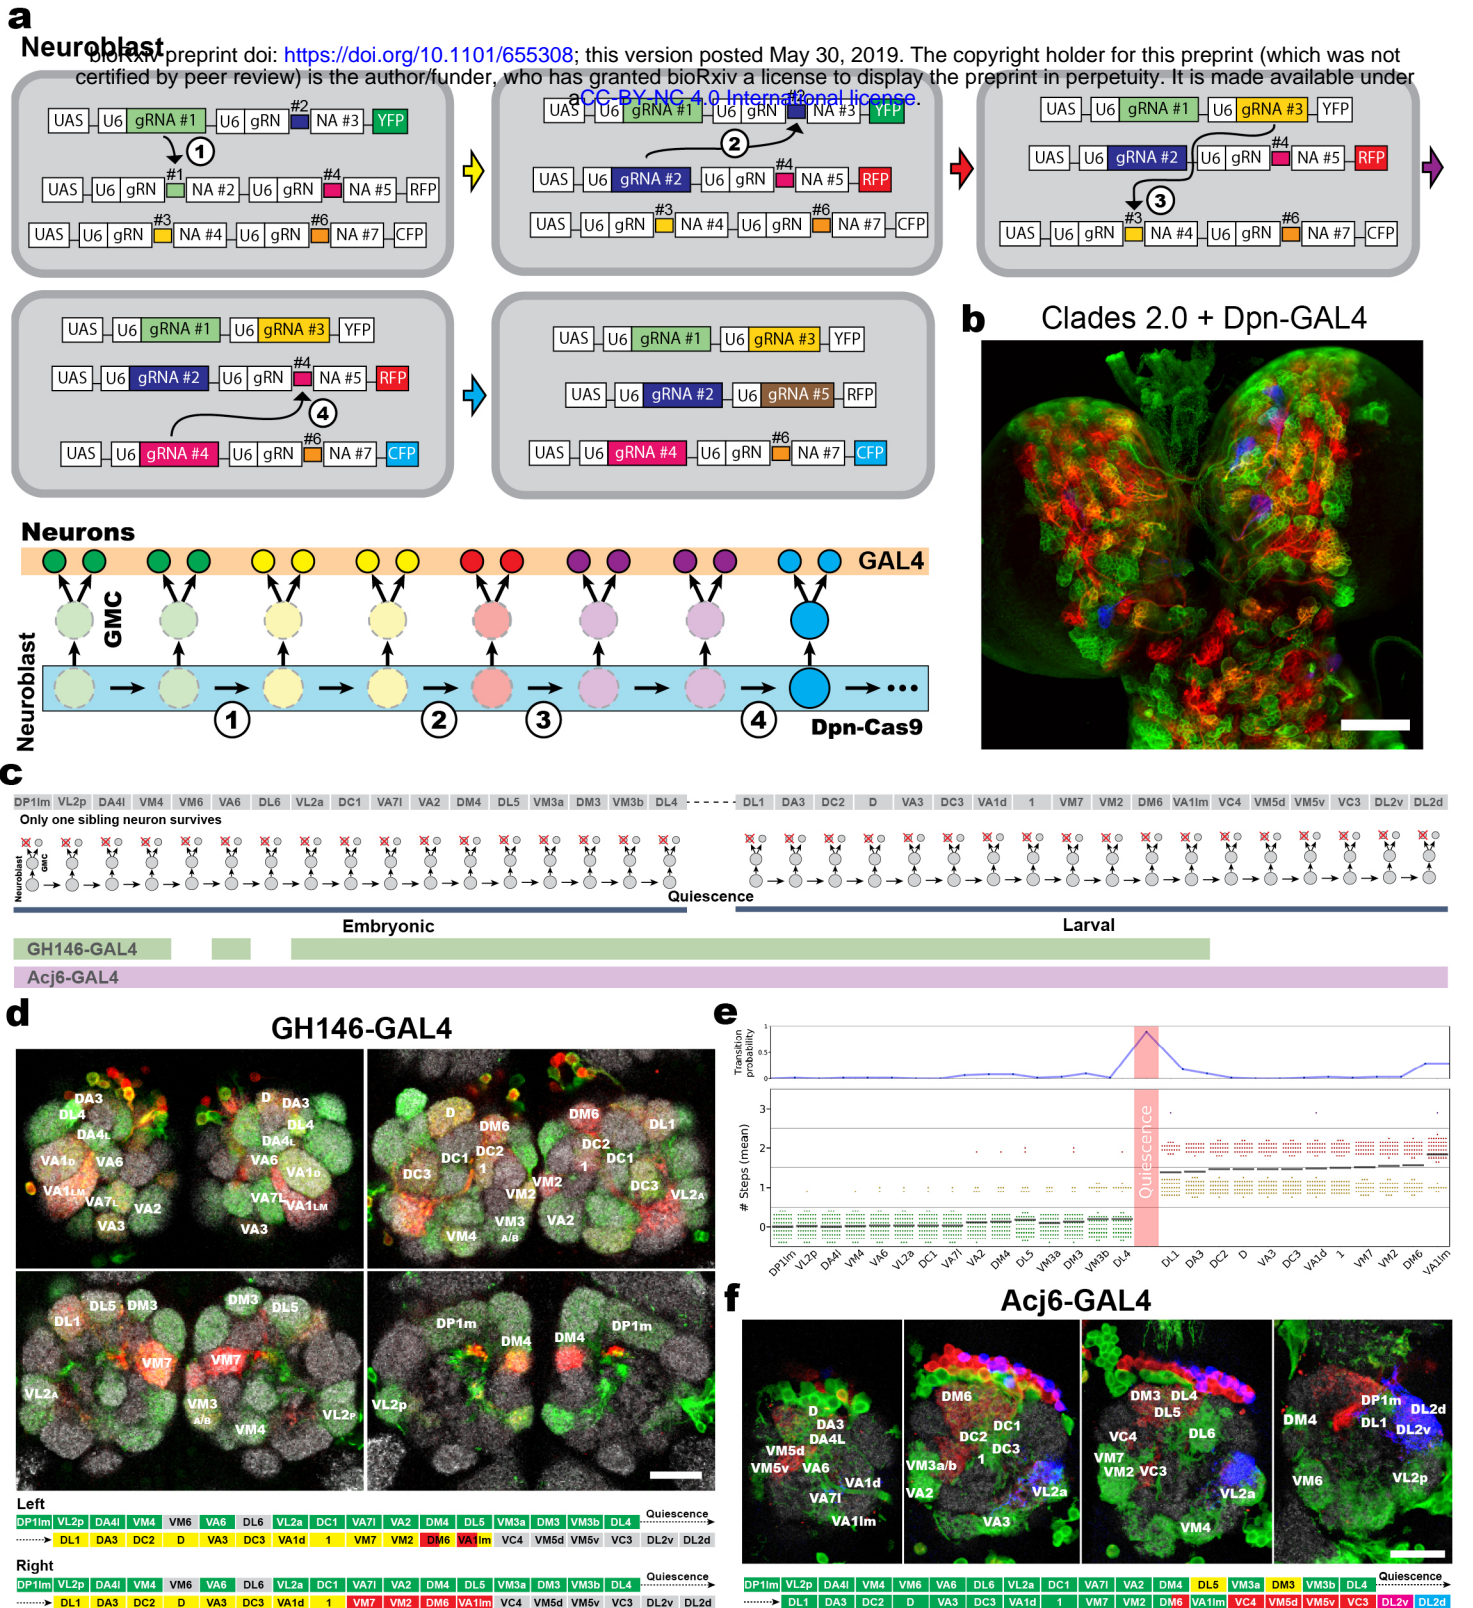

**Fig 4. CLADES 2.0: combining a five-color cascade with GAL4 induction**

(A) Cartoon illustrating the principle of CLADES 2.0. (B) Larval brain (wandering larva/white pupa) showing all neuroblasts labeled by combining CLADES 2.0 with Dpn-GAL4. (C) Scheme showing the order of neuron types generation in the ALad1 lineage. In this lineage only one of the neurons arising from the GMC survives. Whereas Acj6-GAL4 can label the entire lineage, GH146-GAL4 labels only an early window. (D) Representative examples of lineages as labeled by CLADES 2.0 + GH146-GAL4. (E) Below, number of transitions underwent by different neuron types (n=63 clones, 49 brains) labeled with GH146. Points with the same color denote the same value. Horizontal lines represent mean. Above, probability (for each neuronal type) of undergoing at least one transition. Points were placed between two neurons to represent the transition occurred between two types. Note the increase during quiescence and in the latest type (VA11m). (F) Representative example of a lineage labeled with CLADES 2.0 + Acj6-GAL4 (n=6 clones, 6 brains). Green, red, blue and gray, immunohistochemistry for V5 (YFP), RFP, HA (CFP) and Nc82 respectively. Scale bars = 50 micrometers in B and 15 micrometers in D, F.



171 Resolving cell lineages without cell type information provides limited insight. For systematic  
172 characterization and targeting of cell types, the fly community has exploited the GAL4/UAS  
173 system extensively (14). Combining CLADES with GAL4/UAS would allow concurrent  
174 interrogation of lineage progression and cell identity. We therefore constructed a new version of  
175 CLADES (2.0) compatible with the GAL4/UAS system. In order to cover the cells from the  
176 beginning of the lineage, CLADES 2.0 includes a pre-activated first reporter (CLADES2.0-YFP-  
177 ON) which can trigger the cascade of subsequent reporters in all progenitor cells. Moreover, we  
178 sought to extend the traceability by adding a third reporter (CFP), creating a 4-step cascade that  
179 could produce five colors in order: green, yellow, red, purple, blue (Fig. 4A). Importantly, these  
180 reporters are under UAS control and thus can be expressed only in GAL4-positive cells, although  
181 GAL4 is not required for the cascade progression. To validate CLADES 2.0 in all the neuroblast  
182 population, we crossed a fly bearing Dpn-Cas9 and the three CLADES constructs (CLADES2.0-  
183 YFP-ON, CLADES2.0-RFP, and CLADES2.0-CFP) to flies with Dpn-GAL4 (Fig. 4B, S9).  
184 Neuroblasts in the larval brain were predominantly labeled with green, yellow and/or red  
185 fluorescence and a lower proportion of neuroblasts also reached the purple (RFP+CFP) and blue  
186 steps in the cascade. Despite every further step in the cascade is less likely to occur due to the  
187 occurrence of incorrect repair outcomes, the proportion of red neuroblasts was higher compared  
188 to yellow neuroblasts (Fig. S9B). This is probably due to the fact that, besides via SSA, the reporter  
189 inactivation can also occur as a result of incorrect repair events bringing the reporter out of frame  
190 (roughly 66% of indels assuming an equiprobable distribution).

191 To demonstrate the power of CLADES 2.0 for lineage tracing, we set out to reconstruct one of the  
192 most heterogeneous lineages in *Drosophila*, the ALad1 lineage. This lineage generates 40  
193 morphologically distinguishable neuronal types in a known developmental sequence (Fig. 4C, 8).  
194 To this end, we employed two GAL4 lines, Acj6-GAL4 to label the entire lineage and GH146-  
195 GAL4 to selectively mark most of the early-born neuronal types (Fig. 4C). Each GAL4 line was  
196 crossed to a fly bearing Dpn-Cas9 and the CLADES 2.0 constructs. Overall, patterns for both  
197 GH146 (Fig. 4D-E, Table S3) and Acj6 (Fig. 4F) were consistent with previous lineage studies  
198 based on twin-spot MARCM (8). For GH146, we calculated the average number (N=63 ALad1  
199 clones) of cascade steps underwent by the progenitor cell and inherited by each neuronal type (Fig.  
200 4E). Although the exact birth-order of some of the neuronal types (especially in the early window)  
201 could not be determined based on this parameter, the progressive increase along the temporal axis  
202 allowed us to resolve most part of this lineage. At the single-clone level, the general progression  
203 of the cascade also correlates with the previously described birth-order. We only found occasional  
204 inconsistencies at the single-cell level in 29% of clones (Table S3). This phenomenon is likely the  
205 consequence of Cas9 protein perdurance, and thus cascade progression in the GMC. Interestingly,  
206 most of the clones revealed the embryonic and larval-generated neurons in different colors,  
207 suggesting an increased probability of cascade progression during the period of neuroblast  
208 quiescence (Fig. 4E). In some cases, the cascade even progressed two steps during quiescence  
209 (Table S3). In summary, these results demonstrate that CLADES 2.0 allows to reconstruct complex  
210 lineages from a limited number of samples.

## 211 **CLADES as an event tracker: cascade progression across fly generations**

212 The utility of CLADES is not limited to neuronal lineage progression. If Cas9 activity is expressed  
213 under different conditions, CLADES should function as a reporter of other biological events. To  
214 explore this application, we set out to use CLADES as a reporter of fly generations (Fig. 5A-E).

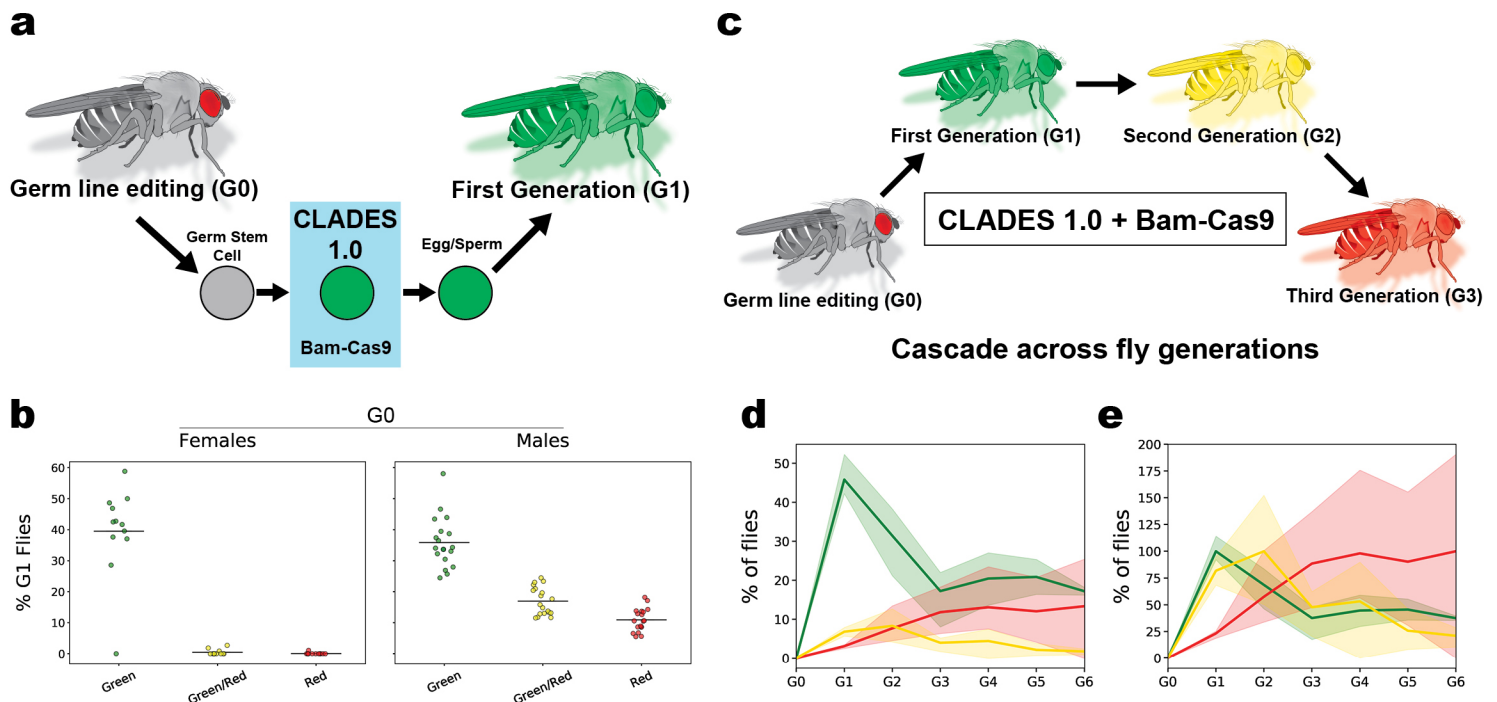

**Fig 5. CLADES as an event tracker: cascade progression over generations**

(A) Cartoon illustrating the progression of CLADES 1.0 in the germ line for the single-generation experiment. (B) Percentage of G1 flies labeled with each reporter combination (n=12 and 18 independent crosses for females and males respectively). Horizontal lines represent mean. (C) Scheme illustrating the progression of CLADES 1.0 across multiple fly generations. (D) Percentage of flies expressing each combination of reporters in each generation (n=3 independent crosses, 20 parents per cross). (E) Percentage of flies normalized to the maximum average value. Areas surrounding the line plot represent the 95% confidence interval.

215 In order to track multiple generations with limited reporters, restricting the cascade progression  
216 once per generation is critical. To this end, we expressed Cas9 with the *bam* promoter, which is  
217 transiently active in the germ line when germline stem cell (GSC) progeny initiate differentiation  
218 (15-16). Therefore, to test CLADES as a reporter of fly generations, we crossed a fly line  
219 expressing Bam-Cas9 and the trigger U6-gRNA#1 to CLADES 1.0. First, we quantified the  
220 number of steps the cascade progressed over a single generation (Fig. 5A-B). To accomplish this,  
221 we generated flies (G0) expressing the two CLADES reporters, the trigger U6-gRNA#1, and Bam-  
222 Cas9, thus initiating the cascade in the germ line. We then crossed individual G0 males and females  
223 with double balancer flies and quantified the percentage of G1 progeny expressing each reporter.  
224 While progeny from G0 females had consistently advanced a single cascade step, the cascade could  
225 progress multiple steps in the progeny of the G0 males (Fig. 5B). Next, we wanted to follow the  
226 cascade progression across multiple generations at the population level. For that, we crossed G0  
227 males to G0 females and selected G1 flies bearing only one CLADES allele. We repeated this  
228 scheme until the sixth generation (G6). We observed that the cascade progressed as expected (Fig.  
229 5D). While the efficacy decayed after the first step, the final population also contained a higher  
230 percentage of red flies compared to yellow flies (as occurred when CLADES 2.0 was targeted to  
231 neuroblasts, Fig. S9). We took this decay into account and plotted the normalized cascade  
232 progression in Figure 5E. G1 was easily distinguished by the high proportion of green flies and  
233 yellow flies, which arises as a result of the combination of gene editing from female and male  
234 parents observed in Fig 5B. In G2, the proportion of yellow flies reached its peak (Fig. 5D&E),  
235 concurrent with a decrease of green and the increase of red flies. In G3-G4 the proportion of red  
236 flies reached its maximum as yellow flies kept decreasing and green flies reached a plateau.  
237 Finally, the populations remained seemingly stable in G5-G6. In summary, when applied to the  
238 germ line, CLADES makes it possible to track generations of flies (at the population level) based  
239 on the proportion of reporters expressed. Also, it allows to delay the activation of reporters/gRNAs  
240 for several generations (see discussion).

## 241 Discussion

242 Synthetic biology holds immense potential for programming complex biology, yet its development  
243 has been largely unavailable to multicellular organisms (17). CLADES overcomes this system  
244 barrier in *Drosophila* and allows the execution of a sequence of conditional clauses: a next step is  
245 triggered only upon activation or deactivation of the previous step. Here we have used this concept  
246 for the sequential transgene activation/deactivation. We have thus created three- to five-color  
247 reporter cascades, therefore maximizing the number of colors that can be generated from a given  
248 number of reporters. This allowed us to reconstruct lineages from the specific reporter combination  
249 expressed by each of the daughter cells. Despite the complex system of genetic relays, CLADES  
250 2.0 lineage tracing is simple as it only requires crossing a CLADES line to a GAL4 line of interest.

251 As a proof-of-concept, we reconstructed the birth order of the ALad1 lineage. We reached a good  
252 balance between the resolution and the number of brains required in the analysis. While we could  
253 potentially improve the resolution by increasing the number of brains, the resolution is more likely  
254 limited by how fast the cascade can progress. The relatively slow progression makes it unlikely to  
255 deduce the order of embryonic-born neurons that arise rapidly during the initial phase of fly  
256 neurogenesis. Another limitation of CLADES is the perdurance of Cas9 activity in the GMC. Some  
257 of the brains in the analysis contained a few neurons whose order was different from previously  
258 described (8). In some cases, these GMC events were particularly abundant over certain time

259 windows, leading to multiple neurons innervating the same glomerulus to be labeled in a non-  
260 chronological manner. Thus, an accurate reconstruction requires sampling multiple brains.  
261 However, the number of brains necessary for accurate lineage reconstruction is extraordinarily low  
262 (~50) when compared to previous methodology requiring thousands of brains (8). Moreover, this  
263 issue could be solved by tightly controlling the concentration of Cas9 in the GMC with  
264 destabilizing protein domains such as geminin (18). Other issues center around the progressivity  
265 of the cascade which can prematurely cease due to unwanted indels. This sub-optimal progressivity  
266 makes it unrealistic to substantially increase the number of steps in the cascade or to create  
267 multidimensional cascades (cascades that could be triggered by other cascades). However, SSA  
268 effectiveness can be as high as 95% when longer repeats are used (9). Therefore, creating gRNAs  
269 scaffolds with longer repeats may improve CLADES drastically. Including more than one target  
270 site in the switch (so that there is more opportunities for SSA) or increasing the number of copies  
271 for each construct could also help to make the expected repair outcome more likely. Future  
272 CLADES versions will incorporate these improvements, as well as an increased editing rate (e.g.  
273 by increasing Cas9 concentration) to speed the cascade progression for more fine-tuned lineage  
274 reconstruction.

275 In its current form, CLADES creates numerous opportunities. First, it allows to trace entire  
276 lineages from a reduced number of brains. Unlike any existent technology, one can also have a  
277 lineage divided into five temporal genetic windows in a single animal.  
278 This five-colors resolution makes it possible for rapid screening of molecular factors involved in  
279 temporal specification, as mutant phenotypes can be associated with birth-order. Further, since  
280 Cas9 works efficiently in most species (19), this tool should be readily applicable to other animal  
281 models where sophisticated lineage tools are not yet available. In vertebrates, neurons usually  
282 undergo migration (20), making morphological identification more straightforward as they do not  
283 cluster together. Cell cycles are also generally slower (21), which should reduce the number of  
284 neurons labeled with the same reporter(s). Another possibility is creating a cascade of  
285 transcriptional activators such as GAL4, LexAp65 or QF (in *Drosophila*). One could thus inhibit  
286 (i.e. UAS-RNAi) or overexpress genes (i.e. to induce apoptosis) and report each manipulation with  
287 different reporters. CLADES could also be used to differentiate stem cells into specific cell types  
288 *in vivo* by delivering genetic cascades. This approach mimics the natural cell specification process  
289 that often occurs as cascades of transcription factors (22-24). CLADES can also be combined with  
290 inducible forms of Cas9 or gRNAs. In that way, one could report cellular events occurring at a  
291 specific time. When applied to the germ line, CLADES may help to optimize the Cas9-based gene  
292 drive technology. One of the main limiting factors of this technology is the accumulation of  
293 mutations in the gRNA target sequence, thus preventing the spread of the gene drive (25).  
294 CLADES could trigger different gene drives in different generations, thus reducing the emergence  
295 of resistant alleles. It could also delay the activation of genes that, in turn, could stop the spread of  
296 the gene drive after several generations. To our knowledge, CLADES is the only existing  
297 technology enabling this type of transgenerational genetic manipulations.

298 Considering lineage tracing, one future prospect of the CLADES concept excels among all others.  
299 The advent of methods based on the progressive accumulation of DNA mutations should, in  
300 theory, allow scientists to reconstruct whole-animal lineages (5-7). Most of these methods, such  
301 as Gestalt (7), use Cas9 to induce mutations in the DNA. However, the target sites for these  
302 mutations become rapidly depleted and only minor portions of lineages can be reconstituted.  
303 Combining lineage tracing via accumulated DNA mutations and CLADES could resolve this

304 problem. Cascades of different gRNAs could be triggered with each gRNA introducing mutations  
305 in a dedicated region. Thus, those targets in each region would remain unedited until the  
306 corresponding gRNA becomes active. Computer simulations showed these gRNA cascades enable  
307 the extended progression of mutations and therefore the length of the lineage that can be resolved  
308 (26). Moreover, CLADES would allow to follow lineage progression based on imaging. Such tool  
309 combination may become the ultimate lineage tracing method to track whole-animal development.

## 310 **References and Notes:**

- 311 1. S. L. Klein, S. A. Moody, When Family History Matters: The Importance of Lineage Analyses  
312 and Fate Maps for Explaining Animal Development (Elsevier Inc., ed. 1, 2016), pp. 93-112
- 313 2. S. A. Moody, Ed., Cell lineage and fate determination (Academic Press, San Diego, CA, 1998).
- 314 3. M. E Buckingham, S. M. Meilhac, Tracing cells for tracking cell lineage and clonal behavior.  
315 *Dev. Cell.* 21, 394–409 (2011).
- 316 4. B. Richier, I. Salecker, Versatile genetic paintbrushes: Brainbow technologies. *Wiley*  
317 *Interdiscip. Rev. Dev. Biol.* 4, 161–180 (2015).
- 318 5. D. Frumkin, A. Wasserstrom, S. Kaplan, U. Feige, E. Shapiro, Genomic variability within an  
319 organism exposes its cell lineage tree. *PLoS Comput. Biol.* 1, e50 (2005).
- 320 6. S. J. Salipante, M. S. Horwitz, Phylogenetic fate mapping. *Proc. Natl. Acad. Sci. U. S. A.* 103,  
321 5448–53 (2006).
- 322 7. A. McKenna et al., Whole-organism lineage tracing by combinatorial and cumulative genome  
323 editing. *Science* (80-. ). 353, aaf7907 (2016).
- 324 8. H. H. Yu et al., A complete developmental sequence of a *Drosophila* neuronal lineage as  
325 revealed by twin-spot MARCM. *PLoS Biol.* 8, 39–40 (2010).
- 326 9. J. Garcia-Marques et al., Unlimited genetic switches for cell-type specific manipulation.  
327 *bioRxiv* (2018) (available at <http://biorxiv.org/content/early/2018/11/14/470443.abstract>).
- 328 10. M. Jinek et al., A Programmable Dual-RNA-Guided DNA Endonuclease in Adaptive Bacterial  
329 Immunity. *Science* (80-. ). 337, 816–821 (2012).
- 330 11. F. L. Lin, K. Sperle, N. Sternberg, Model for homologous recombination during transfer of  
331 DNA into mouse L cells: role for DNA ends in the recombination process. *Mol. Cell. Biol.* 4,  
332 1020–1034 (1984).
- 333 12. R. Bhargava, D. O. Onyango, J. M. Stark, Regulation of Single Strand Annealing. **32**, 566–  
334 575 (2017).
- 335 13. T. Lee, A. Lee, L. Luo, Development of the *Drosophila* mushroom bodies: sequential  
336 generation of three distinct types of neurons from a neuroblast. *Development.* **126**, 4065–76  
337 (1999).
- 338 14. E. E. Caygill, A. H. Brand, “The GAL4 System: A Versatile System for the Manipulation and  
339 Analysis of Gene Expression” in *Drosophila. Methods in Molecular Biology* (Humana Press,  
340 New York, 2016), pp. 33–52.
- 341 15. D. Chen, A discrete transcriptional silencer in the *bam* gene determines asymmetric division  
342 of the *Drosophila* germline stem cell. *Development.* **130**, 1159–1170 (2003).
- 343 16. H. White-Cooper, Tissue, cell type and stage-specific ectopic gene expression and RNAi  
344 induction in the *Drosophila* testis. *Spermatogenesis.* **2**, 11–22 (2012).
- 345 17. J. S. Markson, M. B. Elowitz, Synthetic Biology of Multicellular Systems: New Platforms and  
346 Applications for Animal Cells and Organisms. *ACS Synth. Biol.* **3**, 875–876 (2014).

- 347 18. T. Gutschner, M. Haemmerle, G. Genovese, G. F. Draetta, L. Chin, Post-translational  
348 Regulation of Cas9 during G1 Enhances Homology-Directed Repair. *Cell Rep.* **14**, 1555–1566  
349 (2016).
- 350 19. J. A. Doudna, E. Charpentier, The new frontier of genome engineering with CRISPR-Cas9.  
351 *Science (80-. )*. **346** (2014), doi:10.1126/science.1258096.
- 352 20. M. E. Hatten, Central nervous system neuronal migration. *Annu. Rev. Neurosci.* **22**, 511–539  
353 (1999).
- 354 21. T. Takahashi, The Cell Cycle of the Pseudostratified Embryonic Murine Cerebral Wall. *J.*  
355 *Neurosci.* **15**, 6046–6057 (1995).
- 356 22. X. Li *et al.*, Temporal patterning of *Drosophila* medulla neuroblasts controls neural fates.  
357 *Nature.* **498**, 456–462 (2013).
- 358 23. T. Isshiki, B. Pearson, S. Holbrook, C. Q. Doe, *Drosophila* neuroblasts sequentially express  
359 transcription factors which specify the temporal identity of their neuronal progeny. *Cell.* **106**,  
360 511–521 (2001).
- 361 24. M. E. Wilson, D. Scheel, M. S. German, Gene expression cascades in pancreatic development.  
362 *Mech. Dev.* **120**, 65–80 (2003).
- 363 25. R. L. Unckless, A. G. Clark, P. W. Messer, Evolution of resistance against CRISPR/Cas9 gene  
364 drive. *Genetics.* **205**, 827–841 (2017).
- 365 26. K. Sugino, J. G. Marques, I. E. Medina, T. Lee, Theoretical modeling on CRISPR-coded cell  
366 lineages: efficient encoding and optimal reconstruction. *bioRxiv*, 538488 (2019).
- 367 27. P. D. Hsu *et al.*, DNA targeting specificity of RNA-guided Cas9 nucleases. *Nat. Biotechnol.*  
368 **31**, 827–832 (2013).
- 369 28. J. G. Doench *et al.*, Rational design of highly active sgRNAs for CRISPR-Cas9-mediated gene  
370 inactivation. *Nat. Biotechnol.* **32**, 1262–1267 (2014).
- 371 29. Y. He *et al.*, Self-cleaving ribozymes enable the production of guide RNAs from unlimited  
372 choices of promoters for CRISPR/Cas9 mediated genome editing. *J. Genet. Genomics.* **44**,  
373 469–472 (2017).
- 374 30. F. Port, H.-M. Chen, T. Lee, S. L. Bullock, Optimized CRISPR/Cas tools for efficient germline  
375 and somatic genome engineering in *Drosophila*. *Proc. Natl. Acad. Sci.* **111**, E2967–E2976  
376 (2014).
- 377 31. G. Das, D. Henning, R. Reddy, Structure, organization, and transcription of *Drosophila* U6  
378 small nuclear RNA genes. *J. Biol. Chem.* **262**, 1187–1193 (1987).
- 379 32. A. E. Briner *et al.*, Guide RNA Functional Modules Direct Cas9 Activity and Orthogonality.  
380 *Mol. Cell.* **56**, 333–339 (2014).
- 381 33. M. G. Reese, F. H. Eeckman, D. Kulp D. Haussler, Improved Splice Site Detection in Genie.  
382 *J. Comput. Biol.* **4**, 311–323 (1997).
- 383 34. C. Mosimann *et al.*, Ubiquitous transgene expression and Cre-based recombination driven by  
384 the ubiquitin promoter in zebrafish. *Development.* **138**, 169–177 (2011).
- 385 35. K. M. Kwan *et al.*, The Tol2kit: A multisite gateway-based construction Kit for Tol2  
386 transposon transgenesis constructs. *Dev. Dyn.* **236**, 3088–3099 (2007).
- 387 36. A. C. Groth, M. Fish, R. Nusse, M. P. Calos, Construction of Transgenic *Drosophila* by Using  
388 the Site-Specific Integrase from Phage phiC31. *Genetics.* **166**, 1775–1782 (2004).
- 389 37. T. Awasaki *et al.*, Making *Drosophila* lineage-restricted drivers via patterned recombination  
390 in neuroblasts. *Nat. Neurosci.* **17**, 631–637 (2014).
- 391 38. P. P. Laissue *et al.*, Three-dimensional reconstruction of the antennal lobe in *Drosophila*  
392 melanogaster. **552**, 543–552 (1999).

- 393 39. M. R. Paule, Robert J. White, SURVEY AND SUMMARY Transcription by RNA  
394 polymerases I and III. *Nucleic Acids Res.* **28**, 1283–1298 (2000).  
395 40. R. Kalhor, P. Mali, G. M. Church, Rapidly evolving homing CRISPR barcodes. *Nat. Methods.*  
396 **14**, 195–200 (2017).  
397 41. M. J. Hicks, C. R. Yang, M. V. Kotlajich, K. J. Hertel, Linking splicing to Pol II transcription  
398 stabilizes pre-mRNAs and influences splicing patterns. *PLoS Biol.* **4**, 0943–0951 (2006).  
399 42. M. A. Simon, B. Drees, T. Kornberg, J. M. Bishop, The nucleotide sequence and the tissue-  
400 specific expression of *Drosophila c-src*. *Cell.* **42**, 831–840 (1985).  
401 43. J. F. Hancock, K. Cadwallar, H. Paterson, C. J. Marshall, A CAAX or a CAAL motif and a  
402 second signal are sufficient for plasma membrane targeting of ras proteins. *Trends Cell Biol.*  
403 **2**, 73 (2003).

404 **Acknowledgments:** We thank all members of Tzumin’s lab for their comments and feedback,  
405 especially Rosa Miyares for critical reading and input on the manuscript. We also thank Haluk  
406 Lacin and Eduardo Martin-Lopez for their input on the manuscript .We thank Qingzhong Ren and  
407 Janelia Fly Core for their excellent technical support. We thank our suppliers Rainbow, Genscript  
408 and Benchling for their services. We thank *Drosophila* Genomics Resource Center, supported by  
409 NIH grant 2P40OD010949, for the S2 cell line. Stocks obtained from the Bloomington *Drosophila*  
410 Stock Center (NIH P40OD018537) were used in this study. We thank Crystal Di Pietro and  
411 Kathryn Miller for administrative support; **Funding:** This work was supported by Howard Hughes  
412 Medical Institute; **Author contributions:** Conceptualization, J.G.-M. and T.L.; Methodology,  
413 J.G.-M. and T.L.; Investigation, J.G.-M., C.-P.Y., I.E.-M. and K.M.; Writing – Original Draft,  
414 J.G.-M and T.L.; Writing – Review & Editing, J.G.-M., C.-P.Y., I.E.-M., M.K. and T.L.;  
415 Visualization, J.G.-M., Supervision, M.K. and T.L.; Project Administration, M.L. and T.L.;  
416 Funding Acquisition, M.K. and T.L.; **Competing interests:** J.G.-M. and T.L. have filed a patent  
417 application (PCT/US2018/042731) based on this work with the US Patent and Trademark Office;  
418 and **Data and materials availability:** All data is available in the main text or the supplementary  
419 materials.

## 420 **Supplementary Materials:**

421 Materials and Methods

422 Figures S1-S9

423 Tables S1-S3

424 References (27-43)

## 425 **Fig 1. A conditional gRNA scaffold that is activated by other gRNAs**

426 (A) Cartoon illustrating the conditional gRNA design. (B) Conditional gRNA activation by a  
427 trigger gRNA. For each experiment: left, scheme showing the cascade of events occurring in the  
428 fly brain. Right, representative examples of larval and adult brains showing immunohistochemistry  
429 for GFP expression. N=30 brains. Scale bar = 50  $\mu$ m.

## 430 **Fig 2. A coupled cascade of gRNAs and reporters**

431 (A) The activation of the conditional gRNA#2 (ON cassette) by Cas9 and the trigger gRNA#1  
432 leads to an ORF shift that brings the reporter into frame. Thus, both the gRNA#2 and the reporter  
433 (red fluorescence) become simultaneously active. (B) In the inactivation (or activation of the OFF  
434 cassette), the gRNA#4 is activated by Cas9 and the gRNA#3, bringing the reporter out of frame  
435 (tested with a pre-activated version of the construct). Red, immunohistochemistry for RFP. N=18  
436 brains. Scale bar = 50  $\mu$ m.

437 **Fig 3. CLADES 1.0: two reporters, three colors**

438 (A) Scheme illustrating the cascade progression in CLADES 1.0. (B) Neuronal clone in the larval  
439 brain labeled with CLADES. (C) CLADES labeling in the mushroom body lineage. In the right  
440 hemisphere, the red-only fluorescence labels the full alpha/beta and part of the alpha'/beta'  
441 population, while the green and red or green-only labels the gamma and part of the alpha'/beta'  
442 population. Green, red, gray, immunohistochemistry for GFP (YFP), RFP, Dpn respectively. Scale  
443 bars = 10  $\mu$ m in B and 50  $\mu$ m in C.

444 **Fig 4. CLADES 2.0: combining a five-color cascade with GAL4 induction**

445 (A) Cartoon illustrating the principle of CLADES 2.0. (B) Larval brain (wandering larva/white  
446 pupa) showing all neuroblasts labeled by combining CLADES 2.0 with Dpn-GAL4. (C) Scheme  
447 showing the order of neuronal types generation in the ALad1 lineage. In this lineage only one of  
448 the neurons arising from the GMC survives. Whereas Acj6-GAL4 can label the entire lineage,  
449 GH146-GAL4 labels only an early window. (D) Representative examples of lineages as labeled  
450 by CLADES 2.0 + GH146-GAL4. (E) Below, number of transitions underwent by different  
451 neuronal types (n=63 clones, 49 brains) labeled with GH146. Points with the same color denote  
452 the same value. Horizontal lines represent mean. Above, probability (for each neuronal type) of  
453 undergoing at least one transition. Points were placed between two neurons to represent the  
454 transition occurred between two types. Note the increase during quiescence and in the latest type  
455 (VAL1m). (F) Representative example of a lineage labeled with CLADES 2.0 + Acj6-GAL4 (n=6  
456 clones, 6 brains). Green, red, blue and gray, immunohistochemistry for V5 (YFP), RFP, HA (CFP)  
457 and Nc82 respectively. Scale bars = 50  $\mu$ m in B and 15  $\mu$ m in D, F.

458 **Fig 5. CLADES as an event tracker: cascade progression across fly generations**

459 (A) Cartoon illustrating the progression of CLADES 1.0 in the germ line for the single-generation  
460 experiment. (B) Percentage of G1 flies labeled with each reporter combination (n=12 and 18  
461 independent crosses for females and males respectively). Horizontal lines represent mean. (C)  
462 Scheme illustrating the progression of CLADES 1.0 across multiple fly generations. (D)  
463 Percentage of flies expressing each combination of reporters in each generation (n=3 independent  
464 crosses, 20 parents per cross). (E) Percentage of flies normalized to the maximum average value.  
465 Areas surrounding the line plot represent the 95% confidence interval.



466

467

468  
469  
470  
471  
472  
473  
474  
475  
476  
477  
478  
479  
480  
481  
482  
483  
484  
485  
486  
487  
488  
489  
490  
491

## Supplementary Materials for

### CLADES: a programmable sequence of reporters for lineage tracing

Jorge Garcia-Marques, Ching-Po Yang, Isabel Espinosa-Medina, Minoru Koyama, Tzumin Lee

Correspondence to: [garciamarquesj@janelia.hhmi.org](mailto:garciamarquesj@janelia.hhmi.org), [leet@janelia.hhmi.org](mailto:leet@janelia.hhmi.org)

**This PDF file includes:**

Materials and Methods  
Supplementary Text  
Figs. S1 to S9  
Tables S1 to S3

## 492 **Materials and Methods**

493

### 494 Plasmids Construction

495

496 All the DNA constructs were designed with Benchling (Benchling platform) and generated by  
497 standard cloning techniques, including restriction digest/ligation and PCR assembly. The  
498 sequences for the gRNAs were selected based on their low off-target (27) and their high on-target  
499 activity (28). The lowest score was 79.8 and 93.9 for on-target and off-target activity respectively  
500 (see Table 2). The final constructs were verified by sequencing.

501

### 502 *Conditional gRNA*

503

- 504 • Variant #1: a FseI-HH-gRN(#2)NA#1-HDV-HindIII fragment was *de novo* synthesized  
505 (Genscript). This contains a conditional gRNA#1 activatable by the gRNA#2 and flanked  
506 by the Hammerhead and HDV ribozymes (29). This fragment was then cloned into a  
507 FseI/HindIII site in DpnEE-pBPKD1Uw (Tzumin Lee lab).
- 508 • Variant #2: a block containing the conditional U6:3 promoter (activatable by the gRNA#2)  
509 and the gRNA#1 was *de novo* synthesized (gBlock, IDT) and cloned into a HindIII-EcoR  
510 site in pCFD3 (30)
- 511 • Variants #3-6: a cassette containing the U6:3 promoter (30) and the corresponding  
512 gRN[#1]NA#2 was assembled by PCR and then cloned into a HindIII-EcoRI site in  
513 pCFD3.
- 514 • Variants #7-12: a block containing the U6:3 promoter and the corresponding  
515 gRN(#2)NA#1 was *de novo* synthesized (gBlock, IDT) and cloned into a HindIII-EcoR  
516 site in pCFD3.
- 517 • Variants #13-14: a cassette containing the U6:3 promoter and the conditional  
518 gRN(#2)NA#1 was assembled by PCR. This step included PCR-amplifying part of the  
519 Neomycin gene as an arbitrary sequence to increase the length of the repeats involved in  
520 SSA. The full cassette was then cloned into a HindIII-EcoR site in pCFD3.

521

### 521 *CLADES*

522

- 523 • Construct #1: we first designed this construct so that the reporter is initially out of frame.  
524 After the ON cassette is activated, the reporter becomes on frame and none stop codon  
525 should exist in the sequence. To that end we selected the ORF with fewer stop codons and  
526 added random nucleotides when necessary. We also tailored the U6 promoters minimizing  
527 the number of modifications, especially in the regulatory regions (PSEA and TATA box,  
528 31). To remove stop codons and decrease the occurrence of repeats within the construct,  
529 we also modified the gRNA scaffolds without altering the secondary structure (32). We  
530 then generated an EagI-myr::mCherry-p10-EagI fragment by PCR amplifying from  
531 10XUAS-IVS-myr::mcher[#1]rry (9). Given the presence of large repeats in the  
532 mcher[#1]rry gene, the PCR produces the reconstituted mCherry as a subproduct. This  
533 fragment was then cloned into Actin5C-IVS-myr::GF[#2]FP (9), thus generating Actin5C-  
534 IVS-mCherry. We next assembled a fragment NheI-U6:2-gRN(#5)NA#2-T2A::myr-  
535 BamHI (OFF cassette+T2A::myristoylation signal) by PCR. This contained a U6:2  
536 promoter (31) driving a conditional gRNA#2 (activatable by gRNA#5), the sequence for  
537 the T2A peptide (to release the reporter from the OFF cassette) and a myristoylation signal

538 (to direct the reporter to the plasmatic membrane). We also assembled a XhoI-U6:3-  
539 gRN(#3)NA#1-NheI fragment (ON cassette) by PCR. Both fragments were then cloned  
540 into the XhoI/BamHI site in Actin5C-IVS-mCherry. The conditional gRNAs used for this  
541 plasmid are not described in Figure S1. Hereon, all the CLADES plasmids contain the  
542 variant #6 for all the conditional gRNAs.  
543

544 • Construct #2: we generated a mCherry version in which the first four ATG codons were  
545 substituted, still exhibiting strong fluorescence. Briefly, we used degenerate primers to  
546 PCR-amplify mCherry from Actin5C-IVS-mCherry. These primers contained the  
547 degenerate sequence NNH instead of the ATG codons. The PCR product was then cloned  
548 into a bacterial vector for protein expression (pJet1.2/blunt; Thermo Fisher Scientific) and  
549 transformed in bacteria. Subsequently, we sequenced the colonies with the strongest  
550 fluorescence. We finally selected the variant M1L, M10P, M17Q and M23C that we named  
551 mPicota (after a stemless cherry variety uniquely grown in Cáceres, Spain). Next, a XhoI-  
552 U6:3-gRN(#3)NA#4-NheI (ON cassette) and a NheI-U6:2-gRN(#5)NA#6-T2A::myr-  
553 BamHI cassette (OFF cassette+T2A::myristoylation signal) were assembled by PCR. In  
554 these cassettes, two ATG codons in the myristoylation signal and one in the U6:2 promoter  
555 were removed to avoid translation starting after the ON cassette. These fragments and a  
556 BamHI-mPicota-p10(1-44bp)-BsiWI were then cloned into a XhoI-BsiWI site in the  
557 Construct #1.  
558

559 • Construct #3: we sought to remove all the predicted splicing donor and acceptor sites from  
560 the Kozak sequence to the beginning of the reporter. We thus designed a sequence where  
561 the highest score was 0.26 (NNSPLICE 0.9, 33). We introduced multiple modifications  
562 along the sequence, following the guidelines described for the construct #1. To introduce  
563 these modifications, we assembled a cassette KpnI-IVS-U6:3-gRN(#1)NA#3-U6:2-  
564 gRN(#4)NA#7-T2A-myr-BamHI by PCR. With a future cascade in mind, we changed the  
565 reporter and generated a BamHI-3XV5-mCitrine-BsiWI cassette by PCR. Both were then  
566 cloned into a BamHI/BsiWI site in the Construct #1.  
567

568 • Construct #4: a XhoI-U6:3-gRNA#3-SapI (preactivated ON cassette) cassette was cloned  
569 into a XhoI/SapI site in the Construct #3.  
570

571 • Construct #5: a XhoI-SapI fragment containing the Kozak sequence and first start codon  
572 was assembled by primer annealing. We then cloned it into a XhoI/SapI site in the  
573 Construct #4, thus removing the ON cassette.  
574

575 • Construct #6: a SapI-T2A::myr::3XV5-BamHI fragment was assembled by PCR and  
576 cloned into a SapI/BamHI site in the Construct #4, thus removing the OFF cassette. To  
577 reduce the plasmid size and thus increase the probability of transfection, we removed the  
578 mini-white marker by AscI digestion and re-ligation.  
579

580 • Construct #7: we generated (by PCR) a KpnI-IVS-U6:3-gRNA#3-SapI cassette in which  
581 the Kozak sequence and start codon were moved to the end of the U6 promoter and two  
582 ATG codons on frame located in the U6:3 promoter were removed. This was cloned into a  
583 KpnI/SapI site in the Construct #6 (before removing the mini-white marker).

584  
585  
586  
587  
588  
589  
590  
591  
592  
593  
594  
595  
596  
597  
598  
599  
600  
601  
602  
603  
604  
605  
606  
607  
608  
609  
610  
611  
612  
613  
614  
615  
616  
617  
618  
619  
620  
621  
622  
623  
624  
625  
626  
627  
628

- Construct #8: a SapI-T2A-U6:2-gRN(#4)NA#7-T2A-myr-3XV5-BamHI cassette was generated by PCR and cloned into a SapI/BamHI site in the Construct #7. Finally, we removed the mini-white marker by AscI digestion and re-ligation.
- Construct #9: we generated a SapI-spacer-U6:2-gRN(#4)NA#7-T2A-myr-3XV5-BamHI cassette by PCR and cloned it into a SapI/BamHI site in the Construct #8.
- Construct #10: we first designed a U6:3 promoter without the PSEA and TATA-box sequences. This was assembled into a XhoI-U6:3-gRNA#3-SapI cassette by PCR and cloned into a XhoI/SapI site in the Construct #6.
- Construct #11: we designed a construct with controlled splicing in which a splicing donor (score>0.90) was introduced immediately upstream of each U6 promoter. Similarly, a splicing acceptor was embedded in the final region of each U6 promoter. This construct also contains the Kozak sequence and the starting codon at the end of the U6:3 promoter. To clone it, we assembled two cassettes by PCR, a KpnI-U6:3-gRNA#3-SapI and a SapI-U6:2-gRN(#4)NA#7-T2A-myr-3XV5-BamHI. These fragments were then inserted into a KpnI/BamHI site in the Construct #3.
- CLADES1.0-YFP (Construct #12): the final CLADES design was generated by refining the Construct #11. First, we restored the original sequence of the U6 promoters in those modifications aimed to remove stop codons. Due to the controlled splicing, those modifications were no longer necessary as those regions will not be part of the mRNA. These modifications generated a new ATG codon on frame in the U6:2 promoter that we removed by modifying a single nucleotide. Similarly, we moved back the Kozak sequence and the start codon upstream of the ON cassette. We also introduced a strong splicing acceptor before the Kozak sequence, aimed to capture any potential endogenous splicing occurring upstream. Finally, we removed the myristoylation signal and introduced a CAAX signal at the end of the reporter. This was codon optimized for *Drosophila*, as well as the T2A, V5 and CAAX sequences. Following this design, we synthesized three fragments (gBlock, IDT): i) a KpnI-U6:3-gRN(#1)NA#3-SapI, ii) a SapI-U6:2-gRN(#4)NA#7-NotI and iii) a NotI-T2A::3XV5::mCitrine::CAAX-BsiWI. These were cloned into a KpnI/BsiWI site in the Construct #1.
- CLADES1.0-RFP: following the same design used for the Construct #12, three fragments were synthesized (gBlock, IDT): i) a KpnI-U6:3-gRN(#3)NA#4-SapI, ii) a SapI-U6:2-gRN(#5)NA#6-NotI and iii) a NotI-T2A::mPicota::CAAX-BsiWI. These were cloned into a KpnI/BsiWI site in the Construct #1.
- CLADES1.0-CFP: as explained for Construct #12, we synthesized three fragments (gBlock, IDT): i) a KpnI-U6:3-gRN(#7)NA#5-SapI, ii) a SapI-U6:2-gRN(#8)NA#9-NotI

629 and iii) a NotI-T2A::3XHA-mTurquoise2::CAAX-BsiWI. These were cloned into a  
630 KpnI/BsiWI site in the Construct #1.

631

- 632 • CLADES2.0 (CFP, YFP, RFP): an EcoRI-10XUAS-hsp-KpnI cassette was cloned into an  
633 EcoRI/KpnI site in the corresponding CLADES1.0 construct.

634

635 *Triggers*

636

637 U6-gRNA#3 and U6-gRNA#4: annealed primers with the corresponding spacer (the part in the  
638 gRNA providing the specificity) were cloned into a SapI site in pCFD3.

639

640 *Zebrafish*

641

- 642 • Ubi-SpCas9::P2A::mPicota::T2A::mCitr(#1)trine-polyA-U6c-gRN(#7)NA#1: we used  
643 multisite-Gateway cloning to recombine: i) a p5E *ubi* vector (34, Addgene #27320), ii) a  
644 pME vector carrying SpCas9-P2A-mPicota-T2A-mCitr(#1)trine-polyA (9) , iii) a p3E  
645 vector containing U6c-gRN(#7)NA#1 and iv) a pDestTol2 vector (35).

646

647 The p3E vector was built by cloning a U6c-gRN(#7)NA#1 fragment (gBlock, IDT) into a  
648 KpnI/XhoI site in p3E-MCS (Addgene #75174).

649

- 650 • Ubi-Cas9-P2A-mPicota-T2A-mCitr(#1)trine-polyA-U6c-gRN(#7)NA#1-U6d-gRNA#7:  
651 we first generated p3E-U6c-gRN(#7)NA#1-U6d-gRNA#7 by cloning a fragment U6c-  
652 gRN(#7)NA#1 into a KpnI/XhoI in p3E-U6c-gRNA#7 (p3E-U6c-gRNA#3 in 9). Then,  
653 the p3E vector was used for the gateway reaction explained above.

654

655

656 Generation of transgenic flies

657

658 Most lines were generated by using the PhiC31 system (36). Injections were performed by  
659 Rainbow Transgenic Flies Inc.

660

661 Those CLADES lines with a preactivated ON or OFF cassette were generated by crossing the  
662 original CLADES line with a fly bearing Actin-Cas9 and the corresponding gRNA under U6  
663 promoter. Stocks from 10 G1 flies were established and screened by Sanger sequencing to confirm  
664 a perfect SSA event.

665

666 Fly strains

667

668 *Previous stocks*

669

670 The following lines were used in this study: Actin5C-Cas9 (ZH-2A, BDSC#54590), w; Sp/CyO;  
671 MKRS/TM6B (Janelia Fly Facility), BamP-Cas9 (Attp2, Tzumin Lee lab), GH146-GAL4  
672 (BDSC#30026), Acj6-GAL4 (BDSC#30025) and DpnEE-GAL4 (Attp16, 37). The rest of lines  
673 were generated in Garcia-Marques et al. (9): GR44F03-3XgRNA#1 (Attp40), Actin5C-IVS-  
674 myr::GF[#2]FP (VK00018), Actin5C-IVS-myr::mcher[#1]ry (Attp2), DpnEE-IVS-Cas9

675 (VK00033), DpnEE-IVS-Cas9 (Atp40), DpnEE-IVS-Cas9 (Atp2), U6-gRNA#1 (Atp2) and U6-  
676 gRNA#1&2 (Atp40).

677

### 678 *Stocks generated*

679

680 The following lines were generated for this work: CLADES1.0-RFP(VK00033), U6-gRNA#3  
681 (Atp40), U6-gRNA#4 (Atp40), Dpn-gRN[#1]NA#2 (Variant #1)(Atp40), U6-gRN(#2)NA#1  
682 (Variant #2) (Atp2), U6-gRN[#1]NA#2 (Variant #3)(Atp2), U6-gRN[#1]NA#2 (Variant  
683 #4)(Atp40), U6-gRN[#1]NA#2 (Variant #5)(Atp2), U6-gRN[#1]NA#2 (Variant #6)(Atp2), U6-  
684 gRN(#2)NA#1 (Variant #7) (Atp2), U6-gRN(#2)NA#1 (Variant #8) (Atp2), U6-gRN(#2)NA#1  
685 (Variant #9) (Atp2), U6-gRN(#2)NA#1 (Variant #10) (Atp2), U6-gRN(#2)NA#1 (Variant #11)  
686 (Atp2), U6-gRN(#2)NA#1 (Variant #12) (Atp2), U6-gRN(#2)NA#1 (Variant #13) (Atp2), U6-  
687 gRN(#2)NA#1 (Variant #14) (Atp2), CLADES\_optim\_const #1 (Atp40),  
688 CLADES\_optim\_const #2 (Atp40), CLADES\_optim\_const #3 (Atp40), CLADES\_optim\_const  
689 #4 (Atp40), CLADES\_optim\_const #7 (Atp40), CLADES\_optim\_const #8 (Atp40),  
690 CLADES\_optim\_const #11 (Atp40), CLADES\_optim\_const #12 (Atp40, also referred to as  
691 CLADES1.0-YFP), CLADES1.0-YFP(OFF pre-activated) (Atp40), CLADES1.0-YFP  
692 (VK00020), CLADES1.0-RFP(Atp2), CLADES1.0-RFP(VK00033), CLADES1.0-RFP(ON pre-  
693 activated) (VK00033), CLADES1.0-RFP(ON and OFF pre-activated) (VK00033) and  
694 CLADES1.0-CFP (VK00027).

695

### 696 S2 culture and transfections

697

698 *Drosophila* S2 cells (S2-DGRC) were grown in Schneider's *Drosophila* Medium (Thermo Fisher  
699 Scientific) containing 10% heat inactivated fetal bovine serum (Thermo Fisher Scientific) and  
700 pen/streptomycin (Thermo Fisher Scientific). Transfections were performed with the Effectene  
701 Transfection Reagent (Qiagen), following the manufacturer's instructions.

702

### 703 Zebrafish injections

704

705 Adults (3 months-2 years old) were mated to generate embryos. Tol2 mRNA was synthesized from  
706 linearized plasmid using the mMessage mMachine SP6 Transcription kit (Thermo Fisher  
707 Scientific) and purified (RNaseasy Mini Kit, Qiagen) before injection. About 400 embryos for each  
708 experiment were injected at 1-cell-state with 1-2 nanoliters of 25 ng/ul of Tol2 transposase mRNA  
709 and 25 ng/ul of the corresponding Tol2-conditional gRNA plasmid. Fluorescence was examined  
710 after 1 dpf.

711

### 712 Immunostaining and Antibodies

713

714 Larval and adult brains were dissected in PBS and fixed with 4% paraformaldehyde (Electron  
715 Microscopy Sciences) in PBS for 40 minutes. Samples were washed three times in PBS containing  
716 0.5% Triton X-100 (Thermo Fisher Scientific) and then incubated at 4°C overnight with a solution  
717 of primary antibodies, diluted in PBS containing 5% normal goat serum (Thermo Fisher  
718 Scientific). We used the following primary antibodies: anti-Bruchpilot (1:50; DSHB), rat anti-  
719 Deadpan (1:100; Abcam), mouse anti-HA (1:500; Roche), rabbit anti-V5 (1:500; Abcam), rat anti-  
720 RFP (1:500; Chromotek), rabbit anti-DsRed (1:500; Clontech) and rat anti-GFP (1:500; Nacalai).

721 After rinsing three times in PBS, samples were incubated overnight at 4°C with secondary  
722 antibodies (diluted 1:1000 in PBS). The secondary antibodies used were DyLight 405 AffiniPure  
723 Goat Anti-Mouse IgG (Jackson ImmunoResearch), Alexa Fluor® 647-AffiniPure Goat Anti-  
724 Mouse IgG (Jackson ImmunoResearch), Alexa 488-conjugated goat anti-Rat IgG (Thermo Fisher  
725 Scientific), Alexa 488-conjugated goat anti-Rabbit IgG (Thermo Fisher Scientific), Alexa 568-  
726 conjugated goat anti-Rabbit (Thermo Fisher Scientific), Alexa 568 goat anti-Rat IgG (Thermo  
727 Fisher Scientific) and Alexa 647 goat anti-Mouse IgG (Thermo Fisher Scientific). Finally, brains  
728 were washed again in PBS and mounted using SlowFade™ Gold Antifade Mountant (Thermo  
729 Fisher Scientific).

730

### 731 Image acquisition and processing

732

733 Samples were imaged on a Zeiss LSM 880 confocal microscope and processed with Fiji(NIH) and  
734 Adobe Photoshop CC 2018 (Adobe).

735

736 For zebrafish imaging, animals were anesthetized by bath application of 0.02% w/v solution of  
737 Ethyl-3-aminobenzoate methanesulfonate (Sigma-Aldrich, St. Louis) in filtered fish system water  
738 for 1 min. Fish were then mounted in a drop of 1.6% low melting point agarose (Invitrogen) over  
739 a glass-bottomed plate.

740

741 For imaging whole-flies, flies were frozen and adhered to slides with vacuum grease(EMS,  
742 cat#60705). We then imaged slides with a stereo fluorescence microscopy (Olympus). We did not  
743 quantify CFP+ flies given the technical impossibility of distinguishing real signal from  
744 autofluorescence in whole CFP+ flies.

745

### 746 Analysis of repair outcome

747

748 Flies were anesthetized with CO<sub>2</sub> and the head was dissected with forceps. Genomic DNA from  
749 30 heads (for each replicate) was extracted by using the DNeasy Blood & Tissue kit (Qiagen),  
750 following the manufacturer's instructions. DNA samples (200 ng) were used in PCR reactions to  
751 amplify the region of interest, using the Q5 2X Master Mix kit (New England Biolabs). PCR  
752 reactions were performed as indicated by the manufacturer, with 72 degrees as the melting  
753 temperature. The primers (with partial Illumina adapters) used were:

754

755 Amplicon\_F:ACACTCTTTCCCTACACGACGCTCTTCCGATCTNNNNNNCGCCAAGCAG  
756 AGAGGGCGCCAGTGCTC

757 Amplicon\_R:

758 GGACTGGAGTTCAGACGTGTGCTCTTCCGATCTCAAAAAAAGCACCGACTCGGTGCC  
759 AC

760

761 Amplicons (~300 bp) were gel-purified using the QIAquick Gel Extraction kit (Qiagen). Samples  
762 were then sent for NGS-sequencing (Amplicon EZ, Genewitz), recovering a minimum of 50000  
763 reads per sample. Sequencing data was analyzed with a custom algorithm (described below and  
764 available on GitHub).

765

### 766 Quantification and Statistical Analysis



767

768 *Neuroblast counting*

769

770 A minimum of 10 larval brains were dissected and immunostained to detect Dpn, V5(YFP), RFP  
771 and HA (CFP, Figure 8S). We randomly sampled a minimum of 30 dpn+ cells (neuroblasts) from  
772 the central brain and ventral nerve cord. We counted the number of neuroblasts expressing each  
773 combination of marker and expressed it as a percentage out of the total number of sampled  
774 neuroblasts.

775

776 *Algorithm for the analysis of SSA*

777 Amplicon sequencing reads were first checked to remove ultra-short (<30bp) reads as well as reads  
778 with undetermined bases (N) or very poor (<4std) averaged sequencing scores. Paired reads were  
779 then merged through matching the terminal one fifth of the read1 or read2 sequence with the entire  
780 read2 or read1 sequence. Only successfully merged reads were subjected to the following analysis.  
781 First, merged reads were clustered based on complete nucleotide sequence to reveal discrete  
782 amplicon sequences and their read counts. Second, because the coexisting trigger and target  
783 transgenes can be equally amplified, we further retrieved those target-derived amplicon reads  
784 based on the target-specific spacer sequence. Third, we aligned each target-derived unique  
785 sequence to the target's amplicon reference to recover a minimal number of non-overlapping  
786 perfectly matched segments (>4bp in length) that jointly cover as many common bases as possible.  
787 Gap-free sequences were deemed as wild-type reads. Fourth, we searched for gaps possibly  
788 resulting from fusion of direct repeats and consistently annotated such gaps with all the originally  
789 repeated bases lying on the 3' side. Fifth, we clustered indels based on the indices of the involved  
790 bases. Finally, we chose those indels uncovering any of the 5 bases around the trigger-dependent  
791 Cas9 cut (2-6bp away from PAM) for quantification of trigger-induced SSA or other indel events  
792 across different samples.

793

*Glomerular annotation*

794 Glomeruli were annotated as previously described (38). Clones with only green cells were  
795 discarded for the analysis. The average number of steps in the cascade was calculated based on the  
796 color of each glomerulus in each ALad1 clone (green=0 steps, yellow=1, red=2, purple=3, blue=4).  
797 The transition probability was calculated for each neuronal type by dividing the number of clones  
798 in which the cascade progressed in that glomerulus (with respect to the previous glomerulus) by  
799 the total number of ALad1 clones (N=63 clones). As Acj6-GAL4 is also expressed in the olfactory  
800 receptor neurons, for Acj6-GAL4 glomerular annotation the antennae and the maxillary palps of  
801 newly eclosed adult flies were surgically removed. This allows the axons of olfactory receptor  
802 neurons to degenerate so that the morphologies of antennal lobe neurons can be distinguished.

803

**Supplementary Text**

804

*Scaffold optimization (see Fig. S1)*

805

806

807

**Variante #1:** the first variant tested was designed to be expressed under type II promoter (most  
tissue-specific promoters). This required the incorporation of ribozymes to process the gRNA out  
of the mRNA (29). Assuming this requirement, we hypothesized that each part of the conditional

808 gRNA (before and after the target sequence) would lack the upstream or downstream ribozyme,  
809 which would abolish its activity. However, we observed leaky activity even with the more  
810 restricted Dpn-Cas9. We also abandoned the idea of implementing conditional gRNAs for type II  
811 promoters as these are weaker compared to U6 promoters (data not shown).

812  
813 **Variants #2:** instead of inactivating the gRNA, this strategy was based on the inactivation of the  
814 U6 promoter by introducing a switch between the promoter regulatory elements: PSEA and TATA  
815 box. The distance between these elements is fixed and minor modifications have a strong effect on  
816 the promoter activity (39). After the induction of SSA in the switch, the repair outcome would  
817 restore this distance, thus activating the U6 promoter. Unexpectedly, the U6 promoter exhibited a  
818 strong leaky activity even in the initial state.

819  
820 **Variants #3-8:** given the strict requirements of the gRNA structure (32), we hypothesized that  
821 incorporating the switch in the scaffold region should alter the gRNA secondary structure and most  
822 likely abolish its activity. Only after SSA repair, the native sequence would be restored. We  
823 observed considerable leaky activity for most variants, especially with the ubiquitous Actin-Cas9.  
824 Note that variant #5 even exhibited activity for the target sequence, which was also used as a  
825 spacer. To prevent this potential activity, we reversed the target sequence from Variant #8  
826 onwards. However, even without this modification, the Variant #6 showed only minor leaky  
827 activity with Actin-Cas9 and virtually no leaky activity with Dpn-Cas9 (only one clone per 10  
828 brains).

829  
830 **Variants #9-12:** in previous designs, each part of the gRNA should not be enough for activity: the  
831 region upstream from the target lacks most part of scaffold and the region downstream lacks the  
832 spacer (which provides the gRNA specificity). Therefore, we hypothesized that the leaky activity  
833 could be originated from the interaction between both parts. To reduce this possibility, we designed  
834 new variants incorporating a STOP signal (TTTTTT), which should prevent the downstream  
835 sequence from being transcribed. This would limit any potential interaction. Yet, we observed  
836 leaky activity in all these variants, suggesting that the STOP signal fails to end part of the  
837 transcription, and this is enough for the gRNA activity.

838  
839 **Variants #13-14:** based on the work of other labs (40) and our own results, gRNAs can retain  
840 strong activity even if sequence is appended upstream from the spacer. In an attempt to reduce  
841 leakiness and concurrently increase the SSA efficiency (by increasing the length of the direct  
842 repeats in the switch), we introduced an accessory sequence in the switch, upstream from the  
843 spacer region. Surprisingly, we observed strong leaky expression even when the switch upstream  
844 from the spacer was more than 400 bp and contained a STOP signal.

#### 845 *CLADES optimization*

846 **1st design:** the first design of CLADES was based on the incorporation of ON and OFF cassettes  
847 upstream from the reporter gene (construct #1). To avoid direct repeats that otherwise could  
848 interfere with the SSA expected outcome, we used two different U6 promoters: U6:3 and U6:2.  
849 We also diversified each gRNA scaffold based on previous guidelines (32). In the initial  
850 configuration, translation should stop at the ON cassette, therefore not reaching the reporter. To  
851 our surprise, flies bearing this construct in the initial configuration (before crossing to Cas9/trigger  
852 gRNA) exhibited strong fluorescence. We reasoned that translation might start from ATG codons

853 in the reporter, downstream from the OFF cassette. To prevent this hypothetical translation, we  
854 created a reporter version lacking the first ATGs (construct #2). However, flies bearing this  
855 construct also exhibited strong fluorescence. We then hypothesized that the existence of cryptic  
856 splicing sites upstream from the reporter could change the ORF and bring the reporter on frame  
857 even before Cas9 acted. Based on *in silico* prediction, we found strong splicing sites in the U6  
858 promoters. After removing these sites (construct #3), we observed no fluorescence. Moreover,  
859 crossing these flies with the appropriate conditional reporter showed the conditional scaffolds  
860 being part of the ON/OFF cassettes were still functional even after being embedded into the main  
861 gene.

862 **2nd design:** removing all cryptic splicing sites was necessary to avoid reporter expression in the  
863 initial state. However, a pre-activated version (in the ON cassette) of the construct #3 failed to  
864 express the reporter (construct #4). To understand the reason for the lack of expression, we  
865 interrogated this construct by modifying different parts and analyzed fluorescence in S2 cells or  
866 flies. First we hypothesized that the presence of the ON or OFF cassette might interfere with the  
867 transcription or translation of the main gene. We therefore generated new constructs by removing  
868 the ON (construct #5) or the OFF cassette (construct #6), each as a pre-activated version (reporter  
869 on frame). In both cases we did not observe any fluorescence. We also designed a construct  
870 (construct #7) where the OFF cassette was removed and the starting codon (and Kozak sequence)  
871 was moved downstream from the ON cassette, immediately upstream from the reporter gene (on  
872 frame). Even in this configuration the reporter failed to be expressed. Additional efforts in this  
873 direction sought to improve transcription/translation by inserting a T2A (construct #8) or a random  
874 spacer sequence (construct #9) between the ON and OFF cassettes (in the pre-activated version of  
875 the construct). In both cases we failed to achieve the reporter expression. Our second hypothesis  
876 was that the transcription from the U6 promoters impeded transcription or translation of the  
877 reporter gene. To rule out this possibility, we removed the OFF cassette and all the regulatory  
878 elements in the U6 promoter of the ON cassette (construct #10). No significant fluorescence was  
879 observed in this construct (reporter on frame). Based on previous work, we hypothesized that  
880 splicing could be necessary for transcription (41). Therefore, removing all splicing sites could have  
881 abolished the reporter translation. To test this hypothesis, we generated a pre-activated version of  
882 a construct (construct #11) with controlled splicing. In this construct the splicing sites were placed  
883 at the beginning and the end of the U6 promoters. Besides trying to induce splicing, this design  
884 sought to exclude the U6 promoters from the mRNA since these were not necessary for reporter  
885 expression and might affect translation or mRNA stability. This construct exhibited strong  
886 fluorescence and it was the basis for the final optimization.

887 **3rd design:** we demonstrated a design based on controlled splicing exhibited strong fluorescence.  
888 However, the reporter protein was not anchored to the plasma membrane as expected. We reasoned  
889 that the myristoylation signal probably required to be located in the N-terminus of the protein (42).  
890 Given the presence of the T2A signal, placing the myristoylation signal in the N-terminus would  
891 fail to deliver the reporter protein to the plasma membrane. Therefore, we tested CAAX (43) as  
892 an alternative for plasma membrane targeting. This tag was very efficient for membranous  
893 labeling, completing the optimization of CLADES. The final construct met all the requirements:  
894 i) minimal background in the initial state., ii) activation of the ON cassette produced very strong

895 fluorescence delivered to the plasma membrane and iii) fluorescence was removed after the  
896 activation of the OFF cassette.

897 **Captions for Supplementary Figures**

898  
899 **Fig. S1. Optimization of a conditional gRNA.**

900 14 conditional gRNA variants were tested for potential leakiness (activity in the absence of the  
901 trigger gRNA). We examined the ability of the conditional gRNA to activate, via SSA, a specific  
902 conditional reporter (GFP or mCherry) in the absence of the trigger gRNA. Each variant was tested  
903 with Dpn-Cas9 or Actin-Cas9. Given that the target sequence in the variant #5 unexpectedly acted  
904 as an active gRNA, we included a second reporter (red) to analyze this activity. From the variant  
905 #8 onwards we avoided this activity by inverting the orientation of the target sequence. Note that  
906 variant #6 is the least leaky as it shows little activity with Actin-Cas9 and almost no activity at all  
907 with Dpn-Cas9. Green/Red, immunohistochemistry for EGFP/mCherry. Gray, nc82 counterstain.  
908 See also Supplementary Text. N=10 brains. Scale bar = 50  $\mu$ m.

909  
910 **Fig. S2. Analysis of the DNA repair outcome by Next-Generation Sequencing.**

911 (A) Flies bearing Dpn-Cas9 and the trigger gRNA#1 driven by the U6 promoter were crossed to a  
912 fly with the conditional U6-gRN(#1)NA#2. Flies with the three components were analyzed by  
913 PCR-amplifying the region flanking the target site and sequencing this amplicon by Amplicon  
914 Targeted NGS. (B) Most frequent repair outcomes, including SSA that covers about half of the  
915 reads. N=3 replicates, 30 fly heads per replicate.

916  
917 **Fig. S3. A conditional gRNA works efficiently in a model vertebrate (zebrafish).**

918 (A) Tol2-plasmids were injected into 1-cell-stage zebrafish embryos along with mRNA for the  
919 Tol2 transposase. All plasmids encoded for: i) Cas9, ii) an RFP protein (injection control) and iii)  
920 a YF[#2]FP reporter for the gRNA#2 activity (9). These three proteins shared the same ORF and  
921 were under the regulation of the ubiquitous promoter Ubi. Downstream of this cassette we also  
922 placed the conditional U6-gRN[#1]NA#2. (B) In the absence of the trigger gRNA, only few cells  
923 expressed YFP. (C-D) Adding a U6-gRNA #1 to the control plasmid triggered a gRNA cascade,  
924 resulting in most cells expressing YFP. (E) Percentage of YFP+/RFP+ cells. N=22 (control) and  
925 11(experimental), 3 independent experiments. Scale bar = 200  $\mu$ m.

926  
927 **Fig. S4. Uncoupling between the gRNA cascade and the reporter cascade.**

928 (A) Representative example of the correct order for a cascade of gRNAs controlling the activation  
929 of multiple reports *in trans*. Since the gRNA#1 is active from the beginning and the gRNA#2  
930 requires to be activated by the gRNA#1, the activation of the RFP reporter should precede the  
931 activation of the GFP. (B) Example where the activation of the second reporter occurs before the  
932 first reporter. In both cases the example corresponds to the lateral lineage in the antennal lobe,  
933 although this was also observed in other lineages. Green, red and gray, immunohistochemistry for  
934 GFP, RFP and nc82 (counterstaining) respectively. Scale bar = 15  $\mu$ m.

935  
936 **Fig. S5. CLADES optimization.**

937 Description of the main steps in the generation of a functional CLADES construct. Constructs #1-  
938 5, #7 and #11-12 were tested as transgenic flies. Constructs #6, 8, 9-10 were tested in S2 cells. See

939 Supplementary Text and Material and Methods for a detailed description of the optimization  
940 process.

941

942 **Fig. S6. Control constructs showing reporter expression for the different states of CLADES.**

943 (A) CLADES construct. In the initial state, no fluorescence is observed as translation stops at the  
944 ON cassette. (B) Pre-activated version of CLADES. In this case, the ON cassette sequence is the  
945 same as the expected SSA repair outcome. Red fluorescence is ubiquitous since translation  
946 progresses to the end of the reporter. (C) Pre-activated+pre-inactivated version of CLADES. Both  
947 the sequence for the ON and OFF cassettes is the same as the expected SSA repair outcome. No  
948 fluorescence is observed as the translation stops at the OFF cassette. Red and gray,  
949 immunohistochemistry for RFP and nc82 respectively. N=12 brains. Scale bar = 50  $\mu$ m.

950

951 **Fig. S7. CLADES 1.0 can only be activated by the combination of Cas9 and the trigger gRNA.**

952 (A) Triggering CLADES 1.0 requires both the trigger gRNA#1 and Cas9. (B) Only a matching  
953 gRNA can trigger each of the CLADES 1.0 reporters. Relevant controls were shown, according to  
954 the order in the cascade. Flies bearing Dpn-Cas9 and a U6-gRNA (#1 or #2) were crossed to a fly  
955 with CLADES 1.0 (A) or only one of the two CLADES 1.0 constructs (B). Green, red and gray,  
956 immunohistochemistry for GFP (YFP), RFP and nc82 respectively. N=24 brains in A and 11 brains  
957 for each case in B. Scale bar = 50  $\mu$ m.

958

959 **Fig. S8. CLADES 1.0 progression over the larval development.**

960 (A) Progression of the CLADES 1.0 cascade over the course of larval development, as triggered  
961 by the ubiquitous U6-gRNA#1 trigger. Green, red and gray, immunohistochemistry for YFP, RFP  
962 and Dpn respectively. (B) Percentage of neuroblasts (n=10 brains, 30 neuroblasts each) exhibiting  
963 the different reporter combinations. (C) Normalization of the data shown in (B) to the maximum  
964 percentage for each combination of reporters. Error bars and areas around the line plot represent a  
965 95% confidence interval.

966

967 **Fig. S9. Progression of CLADES 2.0 in neuroblasts.**

968 (A) Cartoon illustrating the events occurring after combining CLADES 2.0 and Dpn-GAL4.  
969 CLADES progresses in all neuroblasts, driven by Dpn-Cas9. Only those cells expressing Dpn-  
970 GAL4 (neuroblasts, with some perdurance in GMC and neurons) are fluorescent. (B) Percentage  
971 of neuroblasts expressing each combination of reporters. Horizontal lines represent mean. As the  
972 cascade progresses, the proportion of neuroblasts expressing each reporter decays. Only in rare  
973 occasions (4 neuroblasts out of ~3180) unexpected combinations of reporters (blue/green or  
974 green/red/blue) were observed, probably due to the minimal leakiness of the conditional gRNAs  
975 or the incorrect inactivation of reporters by indels. N=15 brains. Scale bar = 50  $\mu$ m.

976

977

**Table S1. List of fly genotypes used in this study**

| Figure | Genotype                                                                                                                                                                    |
|--------|-----------------------------------------------------------------------------------------------------------------------------------------------------------------------------|
| 1B     | +/+; CyO or Sp / Actin5C-IVS-myr::EGF(#2)FP (VK00018); DpnEE-IVS-Cas9 (VK00033) / U6-gRN(#1)NA #2 (variant#6) (Attp2)                                                       |
| 1B     | +/+; Actin5C-IVS-myr::EGF(#2)FP (VK00018) / DpnEE-IVS-Cas9 (Attp40); U6-gRNA#1 (Attp2) / U6-gRN(#1)NA#2 (variant#6) (Attp2)                                                 |
| 1B     | +/+; Actin5C-IVS-myr::EGF(#2)FP (VK00018) / GR44F03-3XgRNA#1 (Attp40); DpnEE-IVS-Cas9 (Attp2) / U6-gRN(#1)NA#2 (variant#6) (Attp2)                                          |
| 2A     | +/+; CyO / Sp; CLADES1.0-RFP (VK00033) / MKRS                                                                                                                               |
| 2A     | +/+; CyO or Sp / U6-gRNA#3 (Attp40); CLADES1.0-RFP (VK00033) / DpnEE-IVS-Cas9 (Attp2)                                                                                       |
| 2B     | +/+; CyO / Sp; Actin-CLADES(RFP-ONpreactivated) (VK00033) / MKRS                                                                                                            |
| 2B     | +/+; CyO or Sp / U6-gRNA#9 (Attp40); Actin-CLADES(RFP-ONpreactivated) (VK00033) / DpnEE-IVS-Cas9 (Attp2)                                                                    |
| 3A     | +/+; GR44F03-3XgRNA#1 (Attp40) / CLADES1.0-YFP (Attp40); CLADES1.0-RFP (Attp2) / DpnEE-IVS-Cas9 (Attp2)                                                                     |
| 3B     | +/+; GR44F03-3XgRNA#1 (Attp40) / CLADES1.0-YFP (Attp40); CLADES1.0-RFP (Attp2) / DpnEE-IVS-Cas9 (Attp2)                                                                     |
| 4B     | +/+; CyO / DpnEE-GAL4 (Attp16); UAS-CLADES(YFP-Onpreactivated) (VK00020), UAS-CLADES(RFP) (VK00033), UAS-CLADES(CFP) (VK00027), DpnEE-IVS-Cas9 (Attp2)                      |
| 4D     | +/+; CyO / GH146-GAL4; UAS-CLADES(YFP-Onpreactivated) (VK00020), UAS-CLADES(RFP) (VK00033), UAS-CLADES(CFP) (VK00027), DpnEE-IVS-Cas9 (Attp2)                               |
| 4E     | +/+; CyO / GH146-GAL4; UAS-CLADES(YFP-Onpreactivated) (VK00020), UAS-CLADES(RFP) (VK00033), UAS-CLADES(CFP) (VK00027), DpnEE-IVS-Cas9 (Attp2)                               |
| 4F     | Acj6-GAL4 / +; CyO/Sp; UAS-CLADES(YFP-Onpreactivated) (VK00020), UAS-CLADES(RFP) (VK00033), UAS-CLADES(CFP) (VK00027), DpnEE-IVS-Cas9 (Attp2)                               |
| 5B     | +/+; CyO / U6-gRNA#1&2 (Attp40); CLADES1.0-YFP (VK00020), CLADES1.0-RFP (VK00033), Actin-CLADES(CFP) (VK00027), Bamp-Cas9 (Attp2) / TM6B                                    |
| 5D     | +/+; CyO / U6-gRNA#1&2 (Attp40); CLADES1.0-YFP (VK00020), CLADES1.0-RFP (VK00033), Actin-CLADES(CFP) (VK00027), Bamp-Cas9 (Attp2) / TM6B                                    |
| 5E     | +/+; CyO / U6-gRNA#1&2 (Attp40); CLADES1.0-YFP (VK00020), CLADES1.0-RFP (VK00033), Actin-CLADES(CFP) (VK00027), Bamp-Cas9 (Attp2) / TM6B                                    |
| S1     | +/+ ; Actin5C-IVS-myr::EGF(#2)FP (VK00018) / DpnEE-HH-gRN(#1)NA#2-HDV(Variant #1) (Attp40); Actin5C-IVS-myr::mCher(#1)ry (Attp2), DpnEE-IVS-Cas9 (VK00033) / TM6B           |
| S1     | Actin5C-Cas9 (ZH-2A); Actin5C-IVS-myr::EGF(#2)FP (VK00018) / DpnEE-gRN(#1)NA#2 (Variant #1) (Attp40); Actin5C-IVS-myr::mCher(#1)ry (Attp2), DpnEE-IVS-Cas9 (VK00033) / TM6B |
| S1     | +/+ ; CyO / Actin5C-IVS-myr::EGF(#2)FP (VK00018); Actin5C-IVS-myr::mCher(#1)ry (Attp2), DpnEE-IVS-Cas9 (VK00033) / U6-gRN(#2)NA#1 (Variant #2) (Attp2)                      |
| S1     | Actin5C-Cas9 (ZH-2A); CyO / Actin5C-IVS-myr::EGF(#2)FP (VK00018); Actin5C-IVS-myr::mCher(#1)ry (Attp2), DpnEE-IVS-Cas9 (VK00033) / U6-gRN(#2)NA#1 (Variant #2) (Attp2)      |
| S1     | +/+ ; CyO / Actin5C-IVS-myr::EGF(#2)FP (VK00018); Actin5C-IVS-myr::mCher(#1)ry (Attp2), DpnEE-IVS-Cas9 (VK00033) / U6-gRN(#1)NA#2 (Variant #3) (Attp2)                      |
| S1     | Actin5C-Cas9 (ZH-2A); CyO / Actin5C-IVS-myr::EGF(#2)FP (VK00018); Actin5C-IVS-myr::mCher(#1)ry (Attp2), DpnEE-IVS-Cas9 (VK00033) / U6-gRN(#1)NA#2 (Variant #3) (Attp2)      |
| S1     | +/+ ; U6-gRN(#1)NA#2 (Variant #4) (Attp40) / Actin5C-IVS-myr::EGF(#2)FP (VK00018); Actin5C-IVS-myr::mCher(#1)ry (Attp2), DpnEE-IVS-Cas9 (VK00033) / TM6B                    |
| S1     | Actin5C-Cas9 (ZH-2A); U6-gRN(#1)NA#2 (Variant #4) (Attp40)/ Actin5C-IVS-myr::EGF(#2)FP (VK00018); Actin5C-IVS-myr::mCher(#1)ry (Attp2), DpnEE-IVS-Cas9 (VK00033) / TM6B     |
| S1     | +/+ ; CyO / Actin5C-IVS-myr::EGF(#2)FP (VK00018); Actin5C-IVS-myr::mCher(#1)ry (Attp2), DpnEE-IVS-Cas9 (VK00033) / U6-gRN(#1)NA#2 (Variant #5) (Attp2)                      |
| S1     | Actin5C-Cas9 (ZH-2A); CyO / Actin5C-IVS-myr::EGF(#2)FP (VK00018); Actin5C-IVS-myr::mCher(#1)ry (Attp2), DpnEE-IVS-Cas9 (VK00033) / U6-gRN(#1)NA#2 (Variant #5) (Attp2)      |
| S1     | +/+ ; CyO / Actin5C-IVS-myr::EGF(#2)FP (VK00018); Actin5C-IVS-myr::mCher(#1)ry (Attp2), DpnEE-IVS-Cas9 (VK00033) / U6-gRN(#1)NA#2 (Variant #6) (Attp2)                      |
| S1     | Actin5C-Cas9 (ZH-2A); CyO / Actin5C-IVS-myr::EGF(#2)FP (VK00018); Actin5C-IVS-myr::mCher(#1)ry (Attp2), DpnEE-IVS-Cas9 (VK00033) / U6-gRN(#1)NA#2 (Variant #6) (Attp2)      |
| S1     | +/+ ; CyO / Actin5C-IVS-myr::EGF(#2)FP (VK00018); Actin5C-IVS-myr::mCher(#1)ry (Attp2), DpnEE-IVS-Cas9 (VK00033) / U6-gRN(#2)NA#1 (Variant #7) (Attp2)                      |

|     |                                                                                                                                                                           |
|-----|---------------------------------------------------------------------------------------------------------------------------------------------------------------------------|
| S1  | Actin5C-Cas9 (ZH-2A); CyO / Actin5C-IVS-myr::EGF(#2)FP (VK00018); Actin5C-IVS-myr::mCher(#1)ry (Atp2), DpnEE-IVS-Cas9 (VK00033) / U6-gRN(#2)NA#1 (Variant #7) (Atp2)      |
| S1  | +/+ ; CyO / Actin5C-IVS-myr::EGF(#2)FP (VK00018); Actin5C-IVS-myr::mCher(#1)ry (Atp2), DpnEE-IVS-Cas9 (VK00033) / U6-gRN(#2)NA#1 (Variant #8) (Atp2)                      |
| S1  | Actin5C-Cas9 (ZH-2A); CyO / Actin5C-IVS-myr::EGF(#2)FP (VK00018); Actin5C-IVS-myr::mCher(#1)ry (Atp2), DpnEE-IVS-Cas9 (VK00033) / U6-gRN(#2)NA#1 (Variant #8) (Atp2)      |
| S1  | +/+ ; CyO / Actin5C-IVS-myr::EGF(#2)FP (VK00018); Actin5C-IVS-myr::mCher(#1)ry (Atp2), DpnEE-IVS-Cas9 (VK00033) / U6-gRN(#2)NA#1 (Variant #9) (Atp2)                      |
| S1  | Actin5C-Cas9 (ZH-2A); CyO / Actin5C-IVS-myr::EGF(#2)FP (VK00018); Actin5C-IVS-myr::mCher(#1)ry (Atp2), DpnEE-IVS-Cas9 (VK00033) / U6-gRN(#2)NA#1 (Variant #9) (Atp2)      |
| S1  | +/+ ; CyO / Actin5C-IVS-myr::EGF(#2)FP (VK00018); Actin5C-IVS-myr::mCher(#1)ry (Atp2), DpnEE-IVS-Cas9 (VK00033) / U6-gRN(#2)NA#1 (Variant #10) (Atp2)                     |
| S1  | Actin5C-Cas9 (ZH-2A); CyO / Actin5C-IVS-myr::EGF(#2)FP (VK00018); Actin5C-IVS-myr::mCher(#1)ry (Atp2), DpnEE-IVS-Cas9 (VK00033) / U6-gRN(#2)NA#1 (Variant #10) (Atp2)     |
| S1  | +/+ ; CyO / Actin5C-IVS-myr::EGF(#2)FP (VK00018); Actin5C-IVS-myr::mCher(#1)ry (Atp2), DpnEE-IVS-Cas9 (VK00033) / U6-gRN(#2)NA#1 (Variant #11) (Atp2)                     |
| S1  | Actin5C-Cas9 (ZH-2A); CyO / Actin5C-IVS-myr::EGF(#2)FP (VK00018); Actin5C-IVS-myr::mCher(#1)ry (Atp2), DpnEE-IVS-Cas9 (VK00033) / U6-gRN(#2)NA#1 (Variant #11) (Atp2)     |
| S1  | +/+ ; CyO / Actin5C-IVS-myr::EGF(#2)FP (VK00018); Actin5C-IVS-myr::mCher(#1)ry (Atp2), DpnEE-IVS-Cas9 (VK00033) / U6-gRN(#2)NA#1 (Variant #12) (Atp2)                     |
| S1  | Actin5C-Cas9 (ZH-2A); CyO / Actin5C-IVS-myr::EGF(#2)FP (VK00018); Actin5C-IVS-myr::mCher(#1)ry (Atp2), DpnEE-IVS-Cas9 (VK00033) / U6-gRN(#2)NA#1 (Variant #12) (Atp2)     |
| S1  | +/+ ; CyO / Actin5C-IVS-myr::EGF(#2)FP (VK00018); Actin5C-IVS-myr::mCher(#1)ry (Atp2), DpnEE-IVS-Cas9 (VK00033) / U6-gRN(#2)NA#1 (Variant #13) (Atp2)                     |
| S1  | Actin5C-Cas9 (ZH-2A); CyO / Actin5C-IVS-myr::EGF(#2)FP (VK00018); Actin5C-IVS-myr::mCher(#1)ry (Atp2), DpnEE-IVS-Cas9 (VK00033) / U6-gRN(#2)NA#1 (Variant #13) (Atp2)     |
| S1  | +/+ ; CyO / Actin5C-IVS-myr::EGF(#2)FP (VK00018); Actin5C-IVS-myr::mCher(#1)ry (Atp2), DpnEE-IVS-Cas9 (VK00033) / U6-gRN(#2)NA#1 (Variant #14) (Atp2)                     |
| S1  | Actin5C-Cas9 (ZH-2A); CyO / Actin5C-IVS-myr::EGF(#2)FP (VK00018); Actin5C-IVS-myr::mCher(#1)ry (Atp2), DpnEE-IVS-Cas9 (VK00033) / U6-gRN(#2)NA#1 (Variant #14) (Atp2)     |
| S2B | +/+; CyO or Sp; DpnEE-IVS-Cas9 (Atp40); U6-gRNA#1 (Atp2) / U6-gRN(#1)NA#2 (Variant #6) (Atp2)                                                                             |
| S4A | +/+ ; GR44F03-3XgRNA#1 (Atp40) / Actin5C-IVS-myr::EGF(#2)FP (VK00018); Actin5C-IVS-myr::mCher(#1)ry (Atp2), DpnEE-IVS-Cas9 (VK00033) / U6-gRN(#1)NA#2 (Variant #6) (Atp2) |
| S4B | +/+ ; GR44F03-3XgRNA#1 (Atp40) / Actin5C-IVS-myr::EGF(#2)FP (VK00018); Actin5C-IVS-myr::mCher(#1)ry (Atp2), DpnEE-IVS-Cas9 (VK00033) / U6-gRN(#1)NA#2 (Variant #6) (Atp2) |
| S5  | CLADES optimization: construct #1 (Atp40)                                                                                                                                 |
| S5  | CLADES optimization: construct #2 (Atp40)                                                                                                                                 |
| S5  | CLADES optimization: construct #3 (Atp40)                                                                                                                                 |
| S5  | CLADES optimization: construct #4 (Atp40)                                                                                                                                 |
| S5  | CLADES optimization: construct #5(Atp40)                                                                                                                                  |
| S5  | CLADES optimization: construct #7 (Atp40)                                                                                                                                 |
| S5  | CLADES optimization: construct #11 (Atp40)                                                                                                                                |
| S5  | CLADES optimization: construct #12 (Atp40)                                                                                                                                |
| S6A | CLADES1.0-RFP (VK00033)                                                                                                                                                   |
| S6B | CLADES1.0-RFP(ON pre-activated) (VK00033)                                                                                                                                 |
| S6C | CLADES1.0-RFP(ON and OFF pre-activated) (VK00033)                                                                                                                         |
| S7A | +/+; U6-gRNA#1&2 (Atp40) / CLADES1.0-YFP (Atp40); CLADES1.0-RFP (Atp2) / TM6B or MKRS                                                                                     |
| S7A | +/+; CyO or Sp / CLADES1.0-YFP (Atp40); CLADES1.0-RFP (Atp2) / DpnEE-IVS-Cas9 (Atp2)                                                                                      |
| S7A | +/+; U6-gRNA#1&2 (Atp40) / CLADES1.0-YFP (Atp40); CLADES1.0-RFP (Atp2) / DpnEE-IVS-Cas9 (Atp2)                                                                            |
| S7B | +/+ ; CyO or Sp / U6-gRNA#1&2 (Atp40); DpnEE-IVS-Cas9 (Atp2) / CLADES1.0-YFP (VK00020)                                                                                    |
| S7B | +/+ ; CyO or Sp / U6-gRNA#1&2 (Atp40); DpnEE-IVS-Cas9 (Atp2) / CLADES1.0-RFP (VK00033)                                                                                    |

|     |                                                                                                                                                        |
|-----|--------------------------------------------------------------------------------------------------------------------------------------------------------|
| S8A | +/+; U6-gRNA#1&2 (Attp40) / CLADES1.0-YFP (Attp40); CLADES1.0-RFP (Attp2) / DpnEE-IVS-Cas9 (Attp2)                                                     |
| S8B | +/+; U6-gRNA#1&2 (Attp40) / CLADES1.0-YFP (Attp40); CLADES1.0-RFP (Attp2) / DpnEE-IVS-Cas9 (Attp2)                                                     |
| S8C | +/+; U6-gRNA#1&2 (Attp40) / CLADES1.0-YFP (Attp40); CLADES1.0-RFP (Attp2) / DpnEE-IVS-Cas9 (Attp2)                                                     |
| S9  | +/+; CyO / DpnEE-GAL4 (Attp16); UAS-CLADES(YFP-Onpreactivated) (VK00020), UAS-CLADES(RFP) (VK00033), UAS-CLADES(CFP) (VK00027), DpnEE-IVS-Cas9 (Attp2) |

978



979  
980  
981

**Table S2. List of gRNAs used in this study**

On-Target and OFF-Target scores were calculated as described in Material and Methods.

| ID     | Sequence              | Also referenced as:                              | ON-Target Score | OFF-Target Score ( <i>Drosophila</i> ) | OFF-Target Score (zebrafish) | Minimum OFF-Target Score (vs. other gRNAs) |
|--------|-----------------------|--------------------------------------------------|-----------------|----------------------------------------|------------------------------|--------------------------------------------|
| gRNA#1 | GTAGTACGATCATAACAACG  |                                                  | 95.6            | 98.1                                   | 93.9                         | 99.9996 (gRNA#3)                           |
| gRNA#2 | GTACATCCATACAGTACCAG  |                                                  | 79.8            | 98.4                                   | N/A                          | 99.9994 (gRNA#3)                           |
| gRNA#3 | GCAACTTTAAAAAACCCAG   | #1 in Fig 2, S6, 4; #2 in Fig 3,5, S7            | 96.6            | 94.2                                   | N/A                          | 99.9932 (gRNA#5)                           |
| gRNA#4 | GCTGCTACCCAAGTTCAAAG  | #2 in Fig 2, S6, 4; #3 in Fig 3,5, S7            | 91              | 95.1                                   | N/A                          | 99.9973 (gRNA#5)                           |
| gRNA#5 | GCAAGGGTCCAAATACACAG  | #3 in Fig 2, S6; #5 in Fig 3, 5, S7; #4 in Fig 4 | 97.3            | 98.1                                   | N/A                          | 99.9932 (gRNA#3)                           |
| gRNA#6 | GTACGCGTCGACATCGACTG  | #4 in Fig 2, S6; #6 in Fig 3, 5, S7; #5 in Fig 4 | 87.5            | 97.6                                   | N/A                          | 99.9973 (gRNA#8)                           |
| gRNA#7 | GCTACGTCAAAGATAACCACG | #4 in Fig 3, 5, S7; #3 in Fig 4, #2 in Fig S3    | 97.8            | 99.1                                   | 97.1                         | 99.997 (gRNA#9)                            |
| gRNA#8 | GCTTGCATCGATATTCGCTG  | #6 in Fig 4, #7 in Fig S7                        | 94.5            | 98.1                                   | N/A                          | 99.9972 (gRNA#6)                           |
| gRNA#9 | GCATCGTCGGATATACTGGG  | #7 in Fig 4, #8 in Fig S7                        | 88.8            | 99.8                                   | N/A                          | 99.997 (gRNA#7)                            |

982  
983  
984



## Conditional gRNA OPTIMIZATION

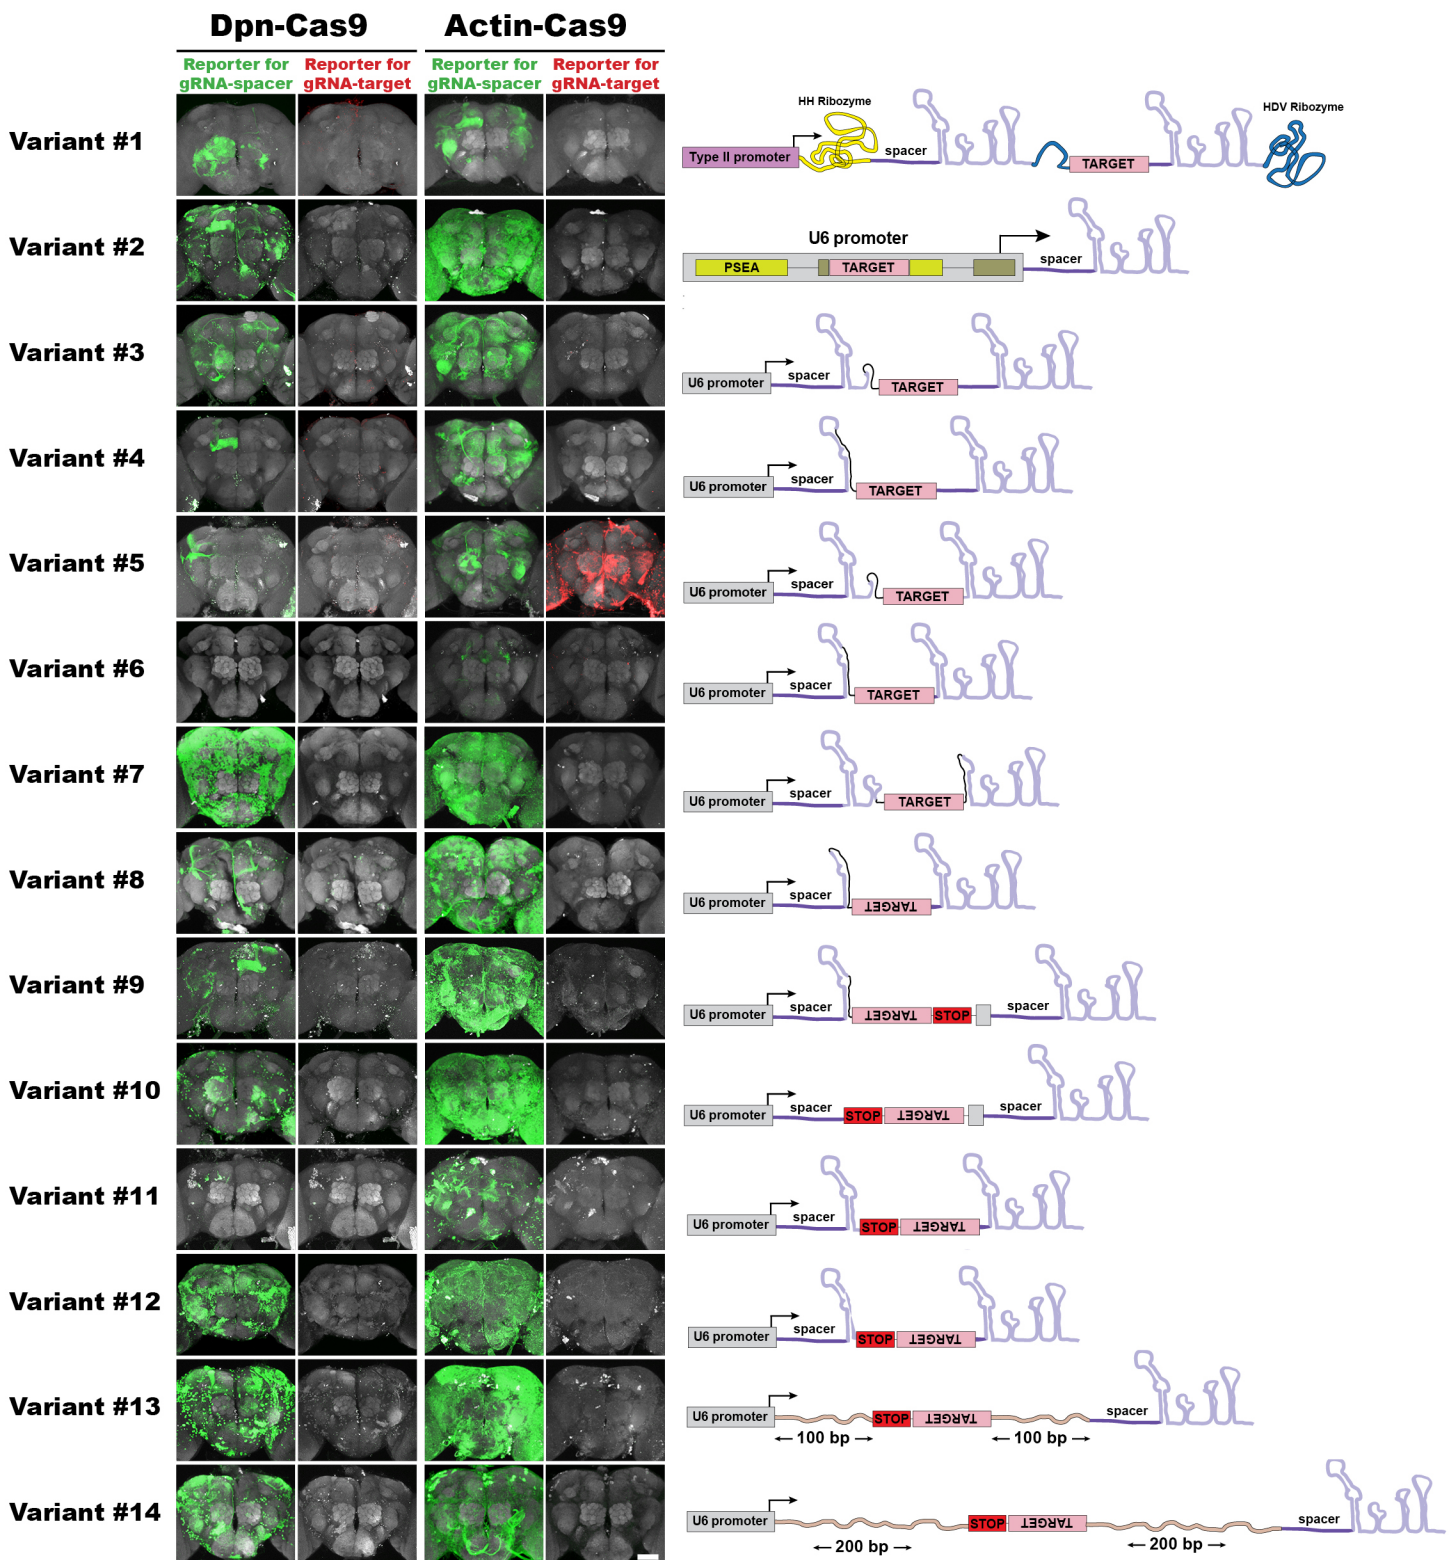

**Fig. S1. Optimization of a conditional gRNA.**

14 conditional gRNA variants were tested for potential leakiness (activity in the absence of the trigger gRNA). We examined the ability of the conditional gRNA to activate, via SSA, a specific conditional reporter (GFP or mCherry) in the absence of the trigger gRNA. Each variant was tested with Dpn-Cas9 or Actin-Cas9. Given that the target sequence in the variant #5 unexpectedly acted as an active gRNA, we included a second reporter (red) to analyze this activity. From the variant #8 onwards we avoided this activity by inverting the orientation of the target sequence. Note that variant #6 is the least leaky as it shows little activity with Actin-Cas9 and almost no activity at all with Dpn-Cas9. Green/Red, immunohistochemistry for EGFP/mCherry. Gray, nc82 counterstain. See also Supplementary Text. N=10 brains. Scale bar = 50 micrometers.

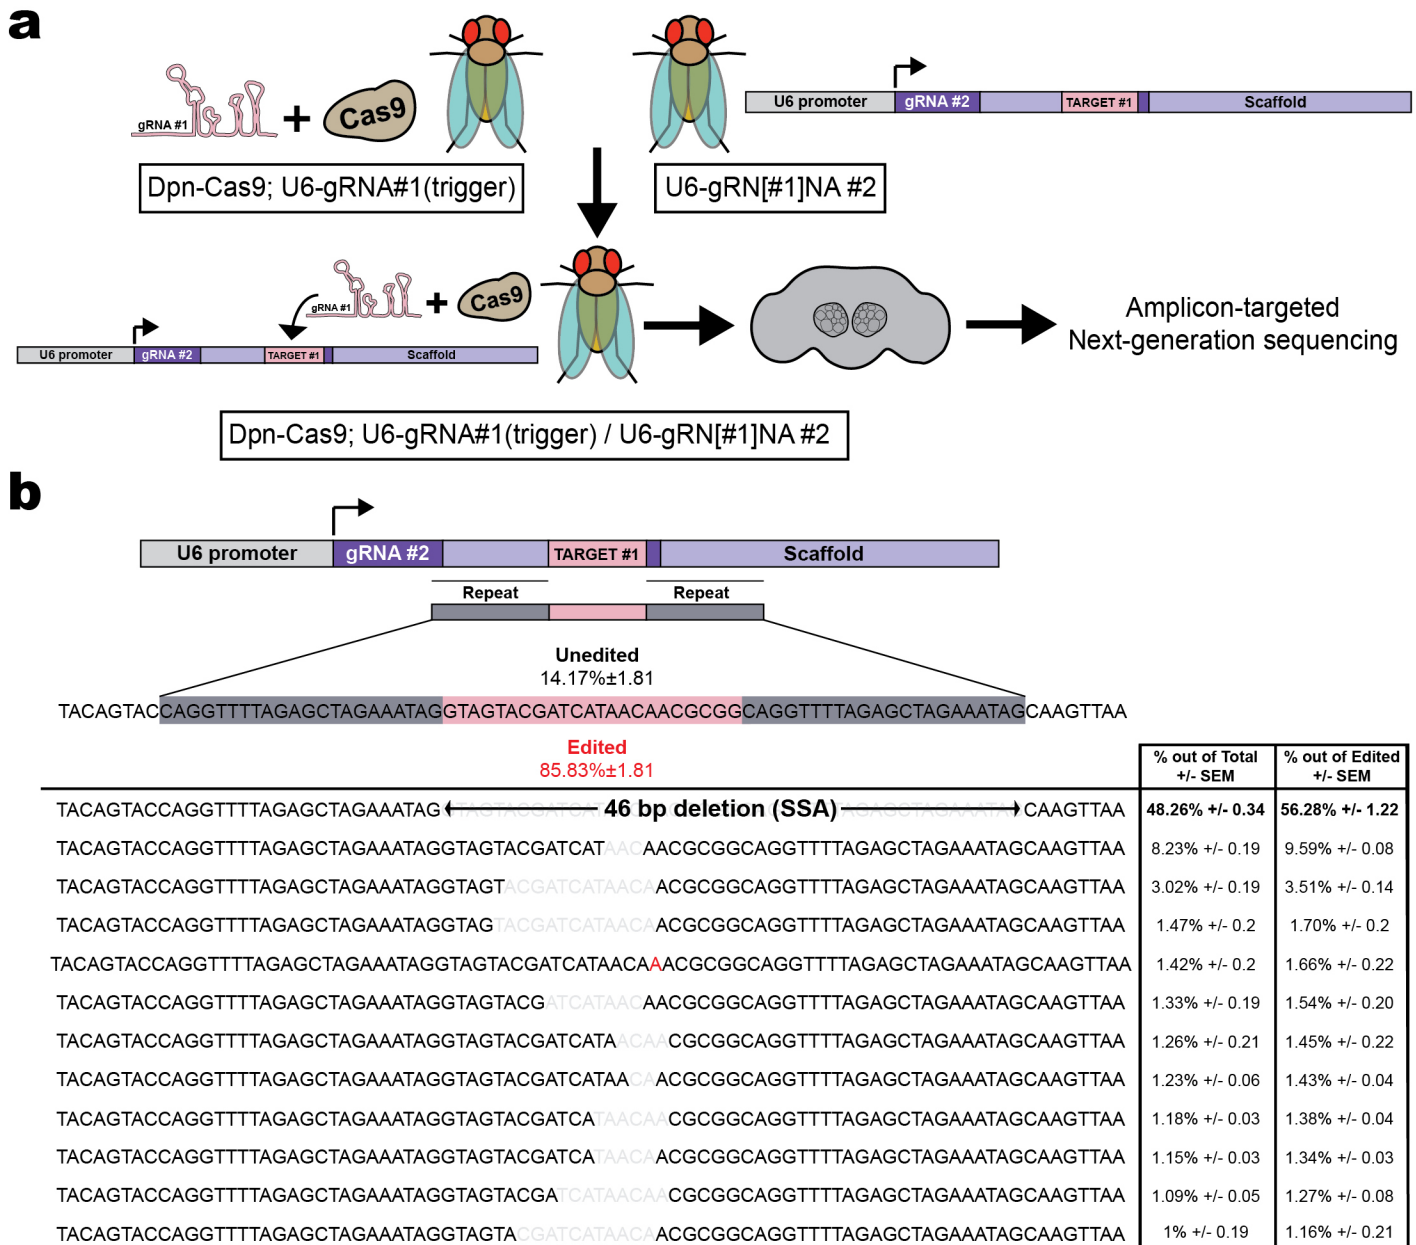

**Fig. S2. Analysis of the DNA repair outcome by Next-Generation Sequencing.**

(A) Flies bearing Dpn-Cas9 and the trigger gRNA#1 driven by the U6 promoter were crossed to a fly with the conditional U6-gRNA(#1)NA#2. Flies with the three components were analyzed by PCR-amplifying the region flanking the target site and sequencing this amplicon by Amplicon Targeted NGS. (B) Most frequent repair outcomes, including SSA that covers about half of the reads. N=3 replicates, 30 fly heads per replicate.

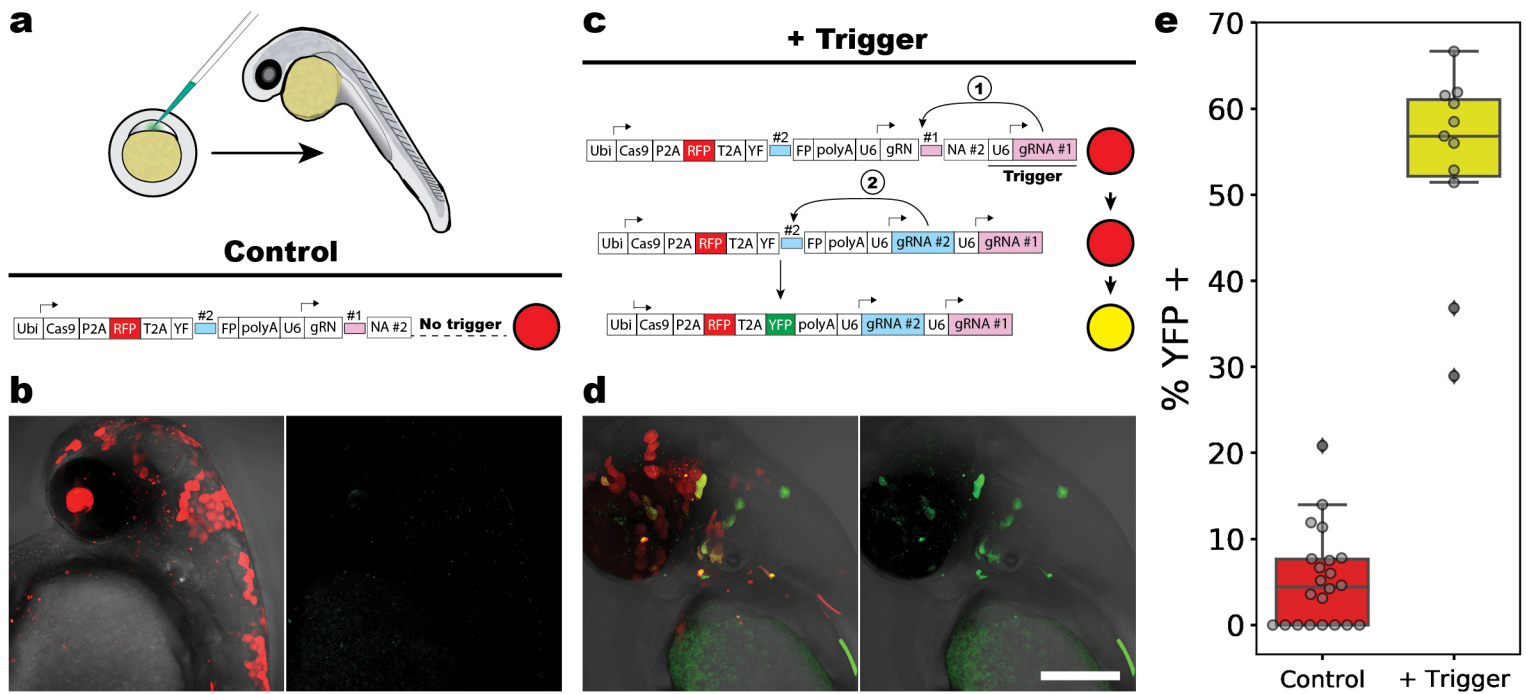

**Fig. S3. A conditional gRNA works efficiently in a model vertebrate (zebrafish).**

(A) Tol2-plasmids were injected into 1-cell-stage zebrafish embryos along with mRNA for the Tol2 transposase. All plasmids encoded for: i) Cas9, ii) an RFP protein (injection control) and iii) a YF[#2]FP reporter for the gRNA#2 activity (9). These three proteins shared the same ORF and were under the regulation of the ubiquitous promoter Ubi. Downstream of this cassette we also placed the conditional U6-gRN[#1]NA#2. (B) In the absence of the trigger gRNA, only few cells expressed YFP. (C-D) Adding a U6-gRNA #1 to the control plasmid triggered a gRNA cascade, resulting in most cells expressing YFP. (E) Percentage of YFP+/RFP+ cells. N=22 (control) and 11(experimental), 3 independent experiments. Scale bar = 200 micrometers.

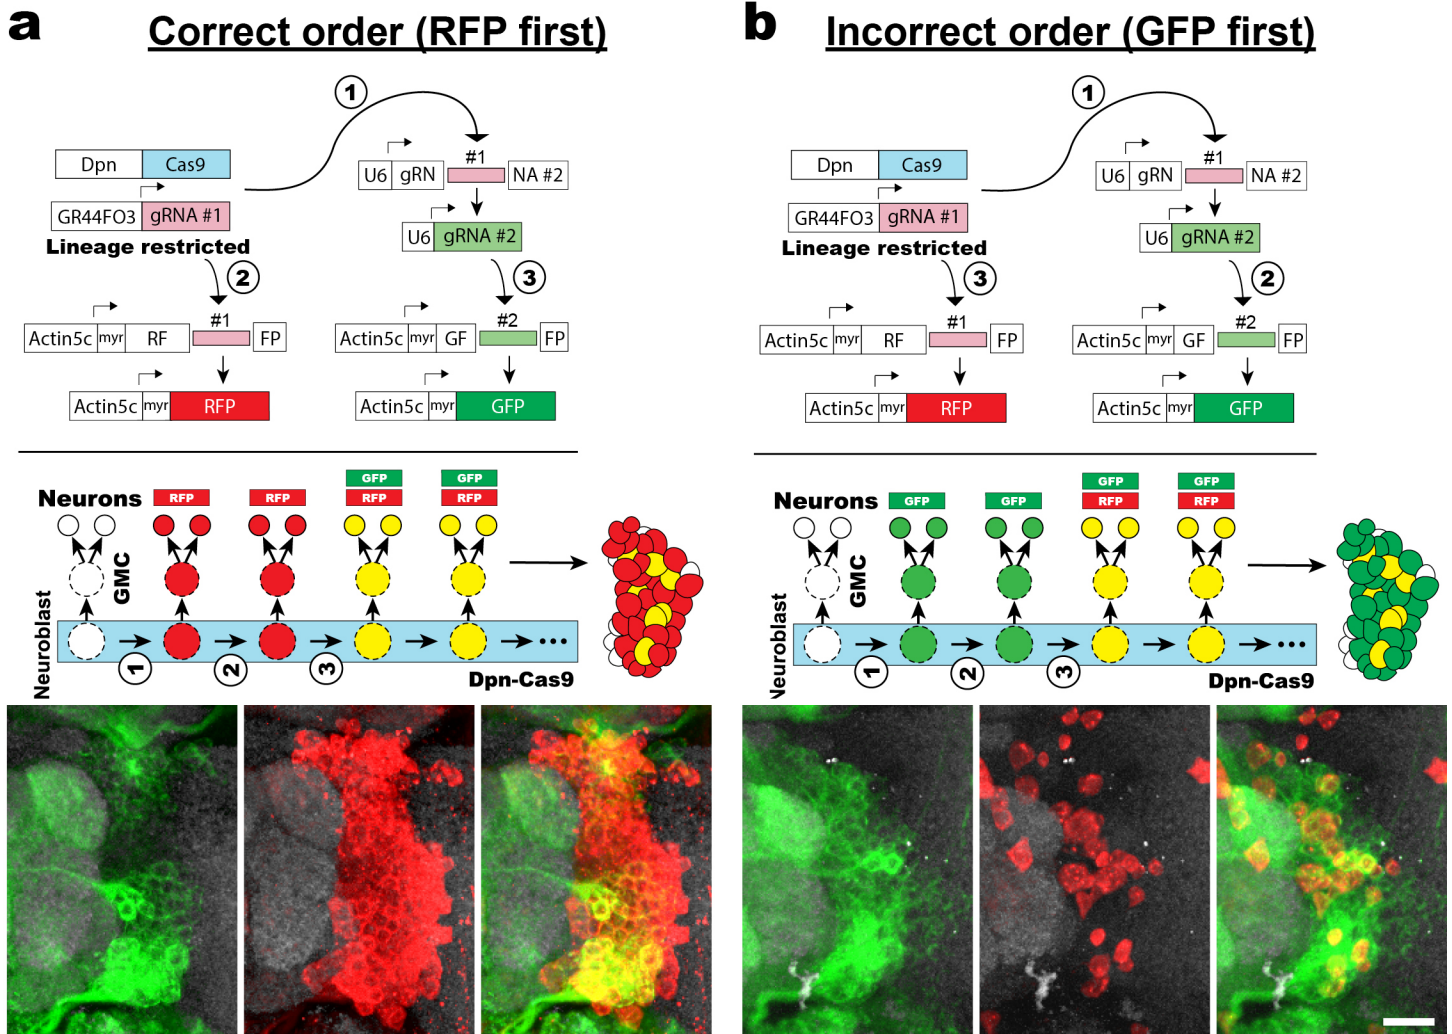

**Fig. S4. Uncoupling between the gRNA cascade and the reporter cascade.**

(A) Representative example of the correct order for a cascade of gRNAs controlling the activation of multiple reports in trans. Since the gRNA#1 is active from the beginning and the gRNA#2 requires to be activated by the gRNA#1, the activation of the RFP reporter should precede the activation of the GFP. (B) Example where the activation of the second reporter occurs before the first reporter. In both cases the example corresponds to the lateral lineage in the antennal lobe, although this was also observed in other lineages. Green, red and gray, immunohistochemistry for GFP, RFP and nc82 (counterstaining) respectively. Scale bar = 15 micrometers.

## CLADES OPTIMIZATION

### 1st design (construct #1) ✗

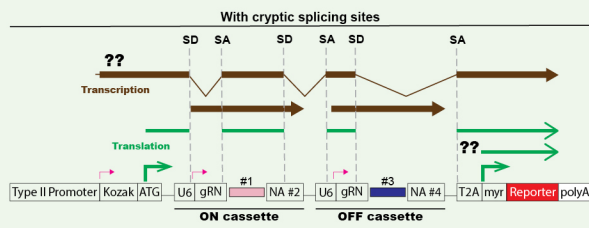

#### Features

- Cassettes ON/OFF to control reporter expression
- U6 promoters are functional even embedded into another gene
- gRNA scaffolds diversified to avoid unintended repeats

Problem: constitutive reporter expression

Hypothetical causes

① Translation starts from starting codons in the reporter

② Cryptic splicing sites place the reporter on frame

Test

Test

Remove the first starting codons in the reporter (construct #2) ✗

Remove all cryptic sites (construct #3) ✓

### 2nd design (construct #4) ✗

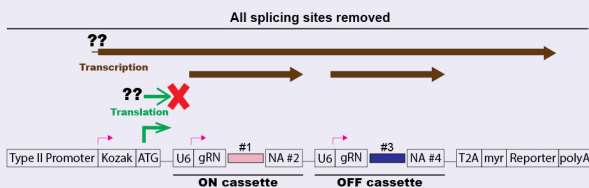

#### Features:

- All cryptic splicing sites removed
- All starting codons in frame with the reporter in the expected mRNA were removed (except the first one)

Problem: no reporter expression at all

Hypothetical causes

① Translation does not progress through ON / OFF cassettes

② U6 transcription interferes with mRNA transcription / translation

③ Splicing is required for proper transcription

Tests

Test

Test

- Remove ON cassette (construct #5) ✗

- Remove OFF cassette (construct #6) ✗

- Remove OFF cassette + move ATG to the end of U6 promoter (construct #7) ✗

- Introduce T2A sequence between ON/OFF cassettes (construct #8) ✗

- Introduce additional sequence between ON/OFF cassettes (construct #9) ✗

- Remove OFF cassette + removing U6 regulatory regions (construct #10) ✗

- Implement a controlled splicing (construct #11) ✓

### Final design (construct #12) ✓

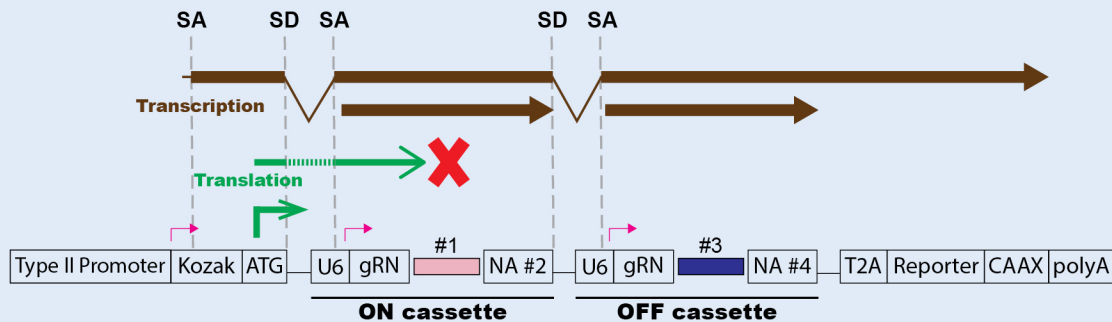

#### Features:

- With splicing acceptors and donors to produce a controlled splicing
- Use of the CAAX sequence for plasma membrane labeling.

**Fig. S5. CLADES optimization.**

Description of the main steps in the generation of a functional CLADES construct. Constructs #1-5, #7 and #11-12 were tested as transgenic flies. Constructs #6, 8, 9-10 were tested in S2 cells. See Supplementary Text and Material and Methods for a detailed description of the optimization process.

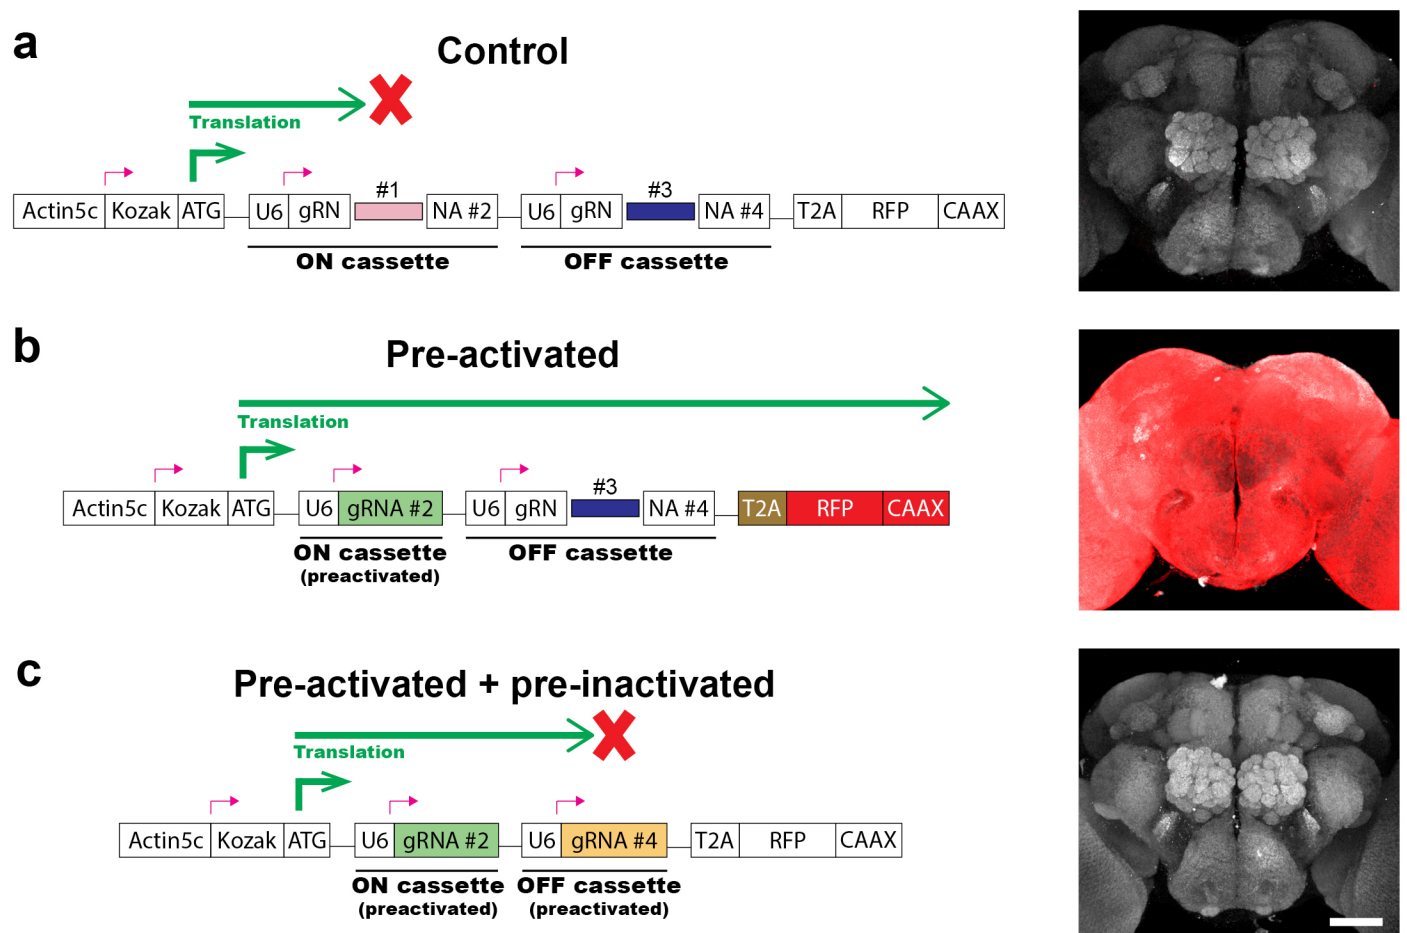

**Fig. S6. Control constructs showing reporter expression for the different states of CLADES.**

(A) CLADES construct. In the initial state, no fluorescence is observed as translation stops at the ON cassette. (B) Pre-activated version of CLADES. In this case, the ON cassette sequence is the same as the expected SSA repair outcome. Red fluorescence is ubiquitous since translation progresses to the end of the reporter. (C) Pre-activated+pre-inactivated version of CLADES. Both the sequence for the ON and OFF cassettes is the same as the expected SSA repair outcome. No fluorescence is observed as the translation stops at the OFF cassette. Red and gray, immunohistochemistry for RFP and nc82 respectively. N=12 brains. Scale bar = 50 micrometers.



**a**

## CLADES 1.0

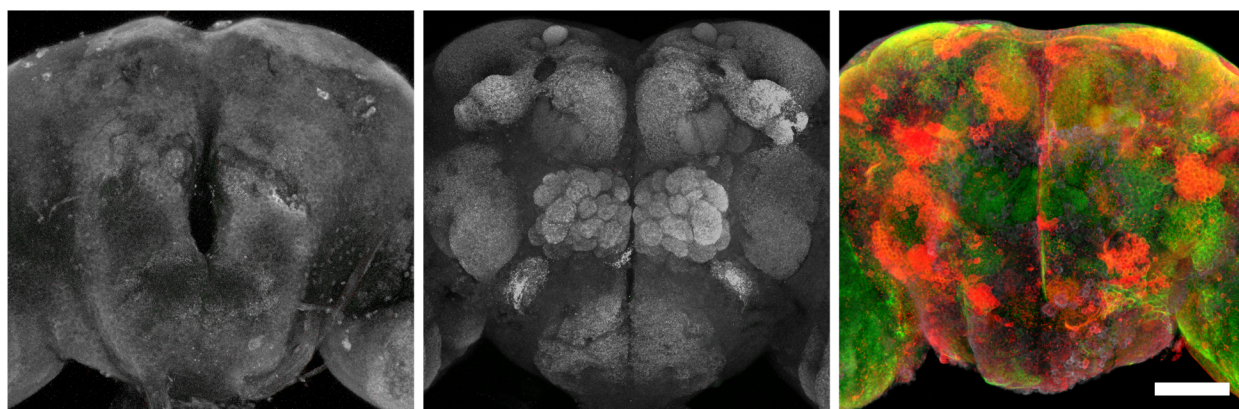

U6-gRNA #1  
(Trigger)

+

-

+

Dpn-Cas9

-

+

+

**b**

### CLADES1.0-YFP

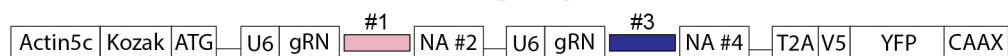

### CLADES1.0-RFP

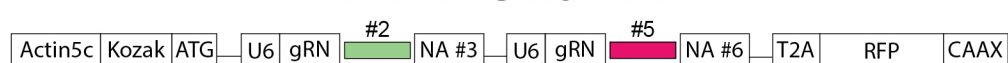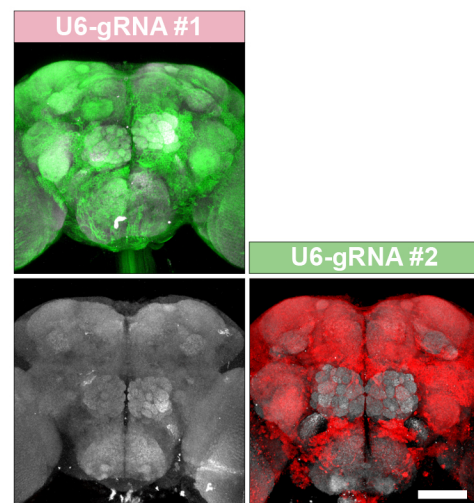

**Fig. S7. CLADES 1.0 can only be activated by the combination of Cas9 and the trigger gRNA.**

(A) Triggering CLADES 1.0 requires both the trigger gRNA#1 and Cas9. (B) Only a matching gRNA can trigger each of the CLADES 1.0 reporters. Relevant controls were shown, according to the order in the cascade. Flies bearing Dpn-Cas9 and a U6-gRNA (#1 or #2) were crossed to a fly with CLADES 1.0 (A) or only one of the two CLADES 1.0 constructs (B). Green, red and gray, immunohistochemistry for GFP (YFP), RFP and nc82 respectively. N=24 brains in A and 11 brains for each case in B. Scale bar = 50 micrometers.

**a**

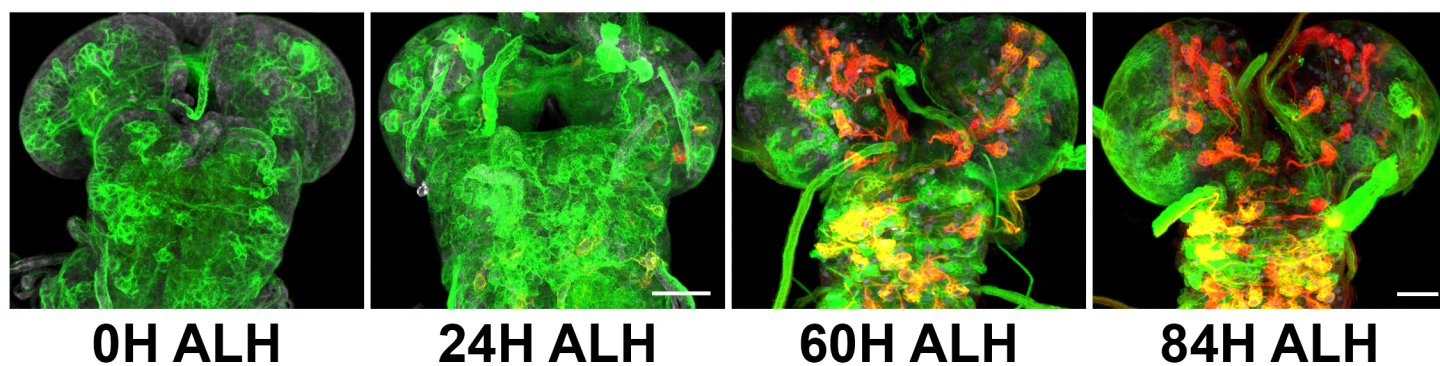

**b**

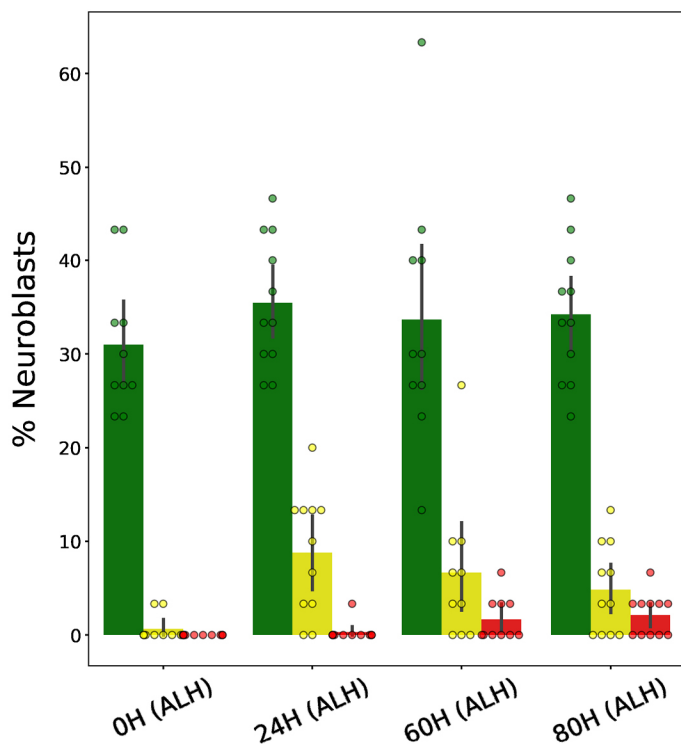

**c**

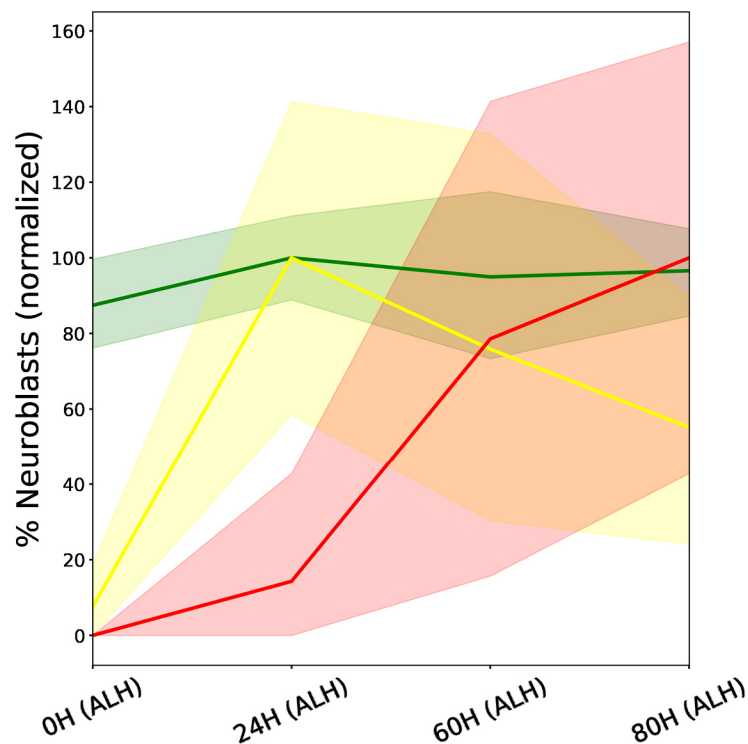

**Fig. S8. CLADES 1.0 progression over the larval development.**

(A) Progression of the CLADES 1.0 cascade over the course of larval development, as triggered by the ubiquitous U6-gRNA#1 trigger. Green, red and gray, immunohistochemistry for YFP, RFP and Dpn respectively. (B) Percentage of neuroblasts (n=10 brains, 30 neuroblasts each) exhibiting the different reporter combinations. (C) Normalization of the data shown in (B) to the maximum percentage for each combination of reporters. Error bars and areas around the line plot represent a 95% confidence interval.

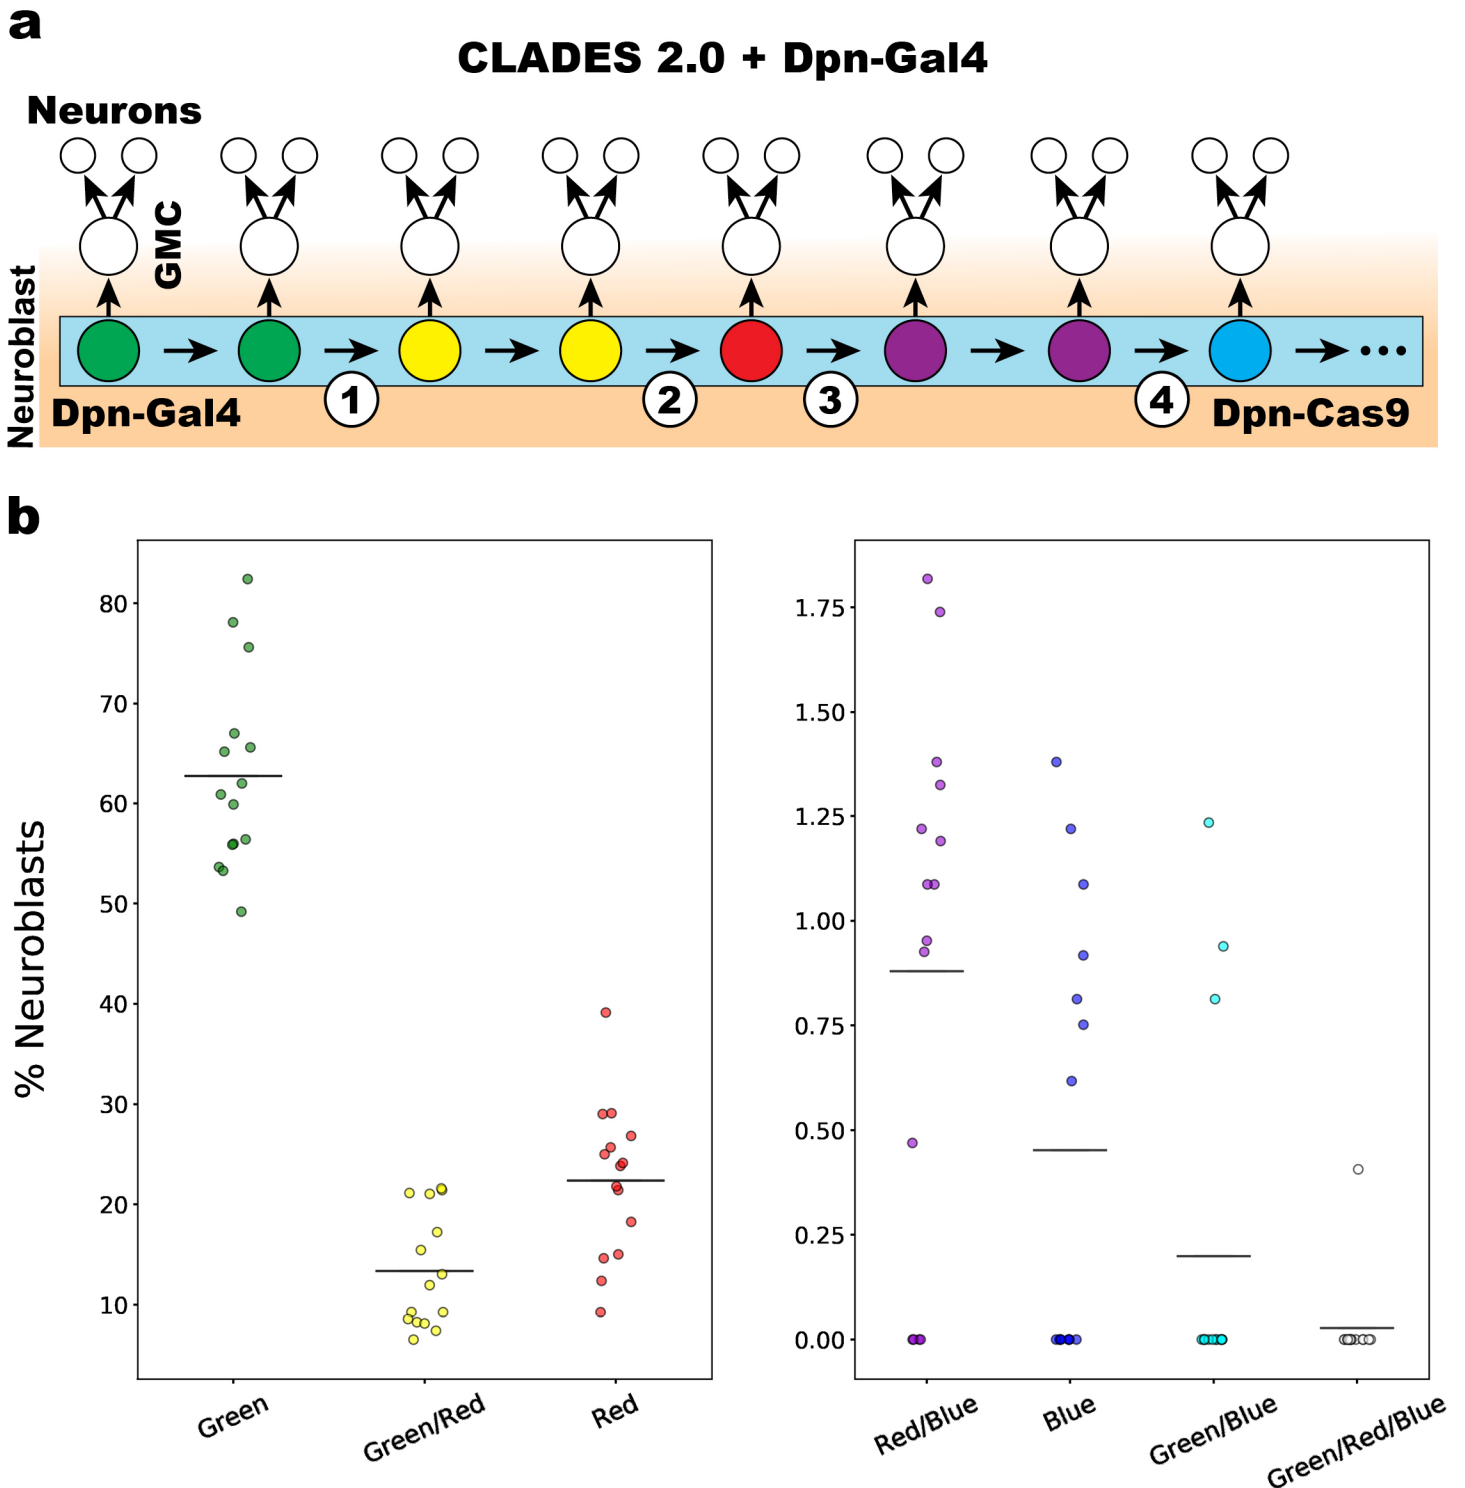

**Fig. S9. Progression of CLADES 2.0 in neuroblasts.**

(A) Cartoon illustrating the events occurring after combining CLADES 2.0 and Dpn-GAL4. CLADES progresses in all neuroblasts, driven by Dpn-Cas9. Only those cells expressing Dpn-GAL4 (neuroblasts, with some perdurance in GMC and neurons) are fluorescent. (B) Percentage of neuroblasts expressing each combination of reporters. Horizontal lines represent mean. As the cascade progresses, the proportion of neuroblasts expressing each reporter decays. Only in rare occasions (4 neuroblasts out of ~3180) unexpected combinations of reporters (blue/green or green/red/blue) were observed, probably due to the minimal leakiness of the conditional gRNAs or the incorrect inactivation of reporters by indels. N=15 brains. Scale bar = 50 micrometers.
